# Supplementary material for: Quantum chemistry reveals thermodynamic principles of redox biochemistry
Source: PLoS Comput Biol. 2018 Oct 24;14(10):e1006471. doi: 10.1371/journal.pcbi.1006471 (PMC6218094; doi:10.1371/journal.pcbi.1006471)
Supplement: S1 Dataset — (XLSX) [file pcbi.1006471.s013.xlsx]

## Sheet: Dataset_S1
redox_pair_names	KEGG_ID	category	Em_quantum_pH7_I25 (mV)	Em_GCM_pH7_I25 (mV)	Em_experiment_pH7_I25 (mV)	KEGG
Formate = Formaldehyde	C00058 = C00067 + C00001	1	-569.535		-559.245	NA	Column	Description
Sulfoacetate = Sulfoacetaldehyde	C14179 = C00593 + C00001	1	-581.161	-544.47		NA	Em_quantum_pH7_I25 (mV)	Calibrated quantum chemistry predicted Em'(pH=7, I = 0.25)
Glycolate = Glycolaldehyde	C00160 = C00266 + C00001	1	-553.425	-536.08		NA	Em_GCM_pH7_I25 (mV)	Group Contribution Method predicted Em'(pH=7, I = 0.25)
Phosphonoacetate = Phosphonoacetaldehyde	C05682 = C03167 + C00001	1	-561.963	-544.554		NA	Em_experiment_pH7_I25 (mV)	Experimental Em'(pH=7, I = 0.25)
Glyoxylate = Glyoxal	C00048 = C14448 + C00001	1	-560.545	-536.078		NA	KEGG	For category G2 only, whether reaction appears in KEGG database
Oxalate = Glyoxylate	C00209 = C00048 + C00001	1	-562.111	-544.474	-460.048	NA
Glycine = Aminoacetaldehyde	C00037 = C06735 + C00001	1	-552.91	-525.979		NA
Acetate = Acetaldehyde	C00033 = C00084 + C00001	1	-548.221	-536.101	-579.879	NA
Fluoroacetate = Fluoroacetaldehyde	C06108 = C15488 + C00001	1	-557.869	-536.079		NA
beta-Alanine = 3-Aminopropanal	C00099 = C05665 + C00001	1	-544.594	-527.687		NA
Propanoate = Propanal	C00163 = C00479 + C00001	1	-546.693	-536.115		NA
(S)-Lactate = (S)-Lactaldehyde	C00186 = C00424 + C00001	1	-548.898	-536.082		NA
Chloroacetic acid = Chloroacetaldehyde	C06755 = C06754 + C00001	1	-550.101	-536.079		NA
3-Phospho-D-glycerate = D-Glyceraldehyde 3-phosphate	C00197 = C00118 + C00001	1	-578.685	-552.513	-532.618	NA
Acrylic acid = Acrolein	C00511 = C01471 + C00001	1	-526.15	-536.113		NA
Pyruvate = Methylglyoxal	C00022 = C00546 + C00001	1	-551.01	-536.079		NA
3-Hydroxypropanoate = 3-Hydroxypropanal	C01013 = C00969 + C00001	1	-550.086	-536.089		NA
Hydroxymalonate = 2-Hydroxy-3-oxopropanoate	C02287 = C01146 + C00001	1	-554.791	-544.49		NA
Propynoate = 2-Propynal	C00804 = C05985 + C00001	1	-557.927	-536.078		NA
D-Glycerate = D-Glyceraldehyde	C00258 = C00577 + C00001	1	-555.273	-536.08	-592.216	NA
(R)-Lactate = (R)-Lactaldehyde	C00256 = C00937 + C00001	1	-546.314	-536.082		NA
Malonate = 3-Oxopropanoate	C00383 = C00222 + C00001	1	-553.154	-544.752		NA
Glycerate 3-phosphate = Glyceraldehyde 3-phosphate	C00597 = C00661 + C00001	1	-578.741	-552.513		NA
Aminomalonate = 2-Aminomalonate semialdehyde	C00872 = C11822 + C00001	1	-579.171	-526.974		NA
Succinate semialdehyde = Succinic aldehyde	C00232 = C16835 + C00001	1	-548.923	-536.087		NA
L-Aspartate = L-Aspartate 4-semialdehyde	C00049 = C00441 + C00001	1	-543.685	-536.023	-648.303	NA
Butanoic acid = Butanal	C00246 = C01412 + C00001	1	-545.175	-536.132	-552.791	NA
Succinate = Succinate semialdehyde	C00042 = C00232 + C00001	1	-554.557	-544.63		NA
4-Aminobutanoate = 4-Aminobutyraldehyde	C00334 = C00555 + C00001	1	-547.902	-527.724		NA
Methylmalonate = (S)-Methylmalonate semialdehyde	C02170 = C06002 + C00001	1	-549.142	-545.081		NA
Dichloroacetate = 2,2-Dichloroacetaldehyde	C11149 = C14858 + C00001	1	-548.596	-536.078		NA
3-Butynoate = 3-Butyn-1-al	C06144 = C06145 + C00001	1	-546.272	-536.083		NA
cis-3-Chloroacrylic acid = cis-3-Chloroallyl aldehyde	C06615 = C16348 + C00001	1	-537.791	-536.079		NA
trans-3-Chloroacrylic acid = trans-3-Chloroallyl aldehyde	C06614 = C06613 + C00001	1	-536.401	-536.08		NA
Methylmalonate = 2-Methyl-3-oxopropanoate	C02170 = C00349 + C00001	1	-547.39	-545.081		NA
2-Methylbutyrate = 2-Methylbutanal	C18319 = C02223 + C00001	1	-544.749	-536.14		NA
L-Arabinonate = L-Arabinose	C00545 = C11476 + C00001	1	-550.342	-536.08		NA
5-Aminopentanoate = 5-Aminopentanal	C00431 = C12455 + C00001	1	-542.161	-527.746		NA
Betaine = Betaine aldehyde	C00719 = C00576 + C00001	1	-555.549	-527.686		NA
N-Acetyl-beta-alanine = 3-Acetamidopropanal	C01073 = C18170 + C00001	1	-557.17	-534.805		NA
4-Hydroxy-L-glutamate = L-4-Hydroxyglutamate semialdehyde	C03079 = C05938 + C00001	1	-542.638	-535.963		NA
3-Methylbutanoic acid = 3-Methylbutanal	C08262 = C07329 + C00001	1	-545.978	-536.146		NA
5-Oxopentanoate = Glutaral	C03273 = C12518 + C00001	1	-555.383	-536.092		NA
L-Glutamate = (S)-4-Amino-5-oxopentanoate	C00025 = C03741 + C00001	1	-582.72	-534.39		NA
L-erythro-4-Hydroxyglutamate = L-4-Hydroxyglutamate semialdehyde	C05947 = C05938 + C00001	1	-561.029	-535.963		NA
2-Oxoglutarate = 4,5-Dioxopentanoate	C00026 = C02800 + C00001	1	-557.778	-544.468		NA
2-Oxoglutarate = 2,5-Dioxopentanoate	C00026 = C00433 + C00001	1	-564.161	-544.472		NA
L-Glutamate = L-Glutamate 5-semialdehyde	C00025 = C01165 + C00001	1	-551.925	-536.036		NA
Imidazole-4-acetate = Imidazole-4-acetaldehyde	C02835 = C05130 + C00001	1	-554.723	-534.462		NA
2-Furoate = Furfural	C01546 = C14279 + C00001	1	-535.659	-536.079		NA
4-Guanidinobutanoate = 4-Guanidinobutanal	C01035 = C02647 + C00001	1	-548.676	-527.708		NA
4-Methylaminobutyrate = 4-Methylaminobutanal	C15987 = C10974 + C00001	1	-545.333	-527.739		NA
Trichloroacetate = Chloral	C11150 = C14866 + C00001	1	-536.676	-536.078		NA
Glutarate = 5-Oxopentanoate	C00489 = C03273 + C00001	1	-565.862	-544.468		NA
Uracil 5-carboxylate = Uracil 5-carbaldehyde	C03030 = C17206 + C00001	1	-561.725	-536.077		NA
D-Glucarate = D-Glucuronic acid	C00818 = C16245 + C00001	1	-554.758	-544.47		NA
Nicotinate = 3-Pyridinaldehyde	C00253 = C07327 + C00001	1	-550.37	-536.079		NA
2-Dehydro-L-idonate = L-Sorbosone	C15673 = C19679 + C00001	1	-556.598	-535.5		NA
L-2-Aminoadipate = L-2-Aminoadipate 6-semialdehyde	C00956 = C04076 + C00001	1	-558.463	-536.119		NA
D-Galacturonate = D-galacto-Hexodialdose	C00333 = C03269 + C00001	1	-555.065	-536.08		NA
(R)-3,3-Dimethylmalate = (R)-4-Dehydropantoate	C01088 = C01053 + C00001	1	-538.423	-544.545		NA
Methylimidazoleacetic acid = Methylimidazole acetaldehyde	C05828 = C05827 + C00001	1	-555.662	-535.596		NA
Adipate = Adipate semialdehyde	C06104 = C06102 + C00001	1	-565.758	-544.467		NA
D-Galactonate = Galactose	C00880 = C01582 + C00001	1	-556.344	-536.08		NA
4-Acetamidobutanoate = N4-Acetylaminobutanal	C02946 = C05936 + C00001	1	-556.782	-533.365		NA
2-Hydroxymuconate = 2-Hydroxymuconate semialdehyde	C02501 = C00682 + C00001	1	-542.491	-544.474		NA
2-Aminomuconate = 2-Aminomuconate semialdehyde	C02220 = C03824 + C00001	1	-543.151	-533.954		NA
L-Histidine = L-Histidinal	C00135 = C01929 + C00001	1	-566.131	-524.021		NA
5-Dehydro-4-deoxy-D-glucarate = 5-Dehydro-4-deoxy-D-glucuronate	C00679 = C04053 + C00001	1	-580.907	-544.47		NA
3-Hydroxybenzoate = 3-Hydroxybenzaldehyde	C00587 = C03067 + C00001	1	-537.389	-535.935		NA
3,4-Dihydroxybenzoate = 3,4-Dihydroxybenzaldehyde	C00230 = C16700 + C00001	1	-527.855	-529.717		NA
2-Hydroxy-5-methyl-cis,cis-muconate = 2-Hydroxy-5-methyl-cis,cis-muconic semialdehyde	C07478 = C06760 + C00001	1	-552.541	-544.474		NA
4-Sulfobenzoate = 4-Sulfobenzaldehyde	C02236 = C06679 + C00001	1	-546.112	-544.473		NA
Pimelate = 7-Oxoheptanoic acid	C02656 = C16590 + C00001	1	-563.052	-544.466		NA
Salicylate = Salicylaldehyde	C00805 = C06202 + C00001	1	-542.616	-535.132		NA
2,5-Dihydroxybenzoate = Gentisate aldehyde	C00628 = C05585 + C00001	1	-546.722	-535.701		NA
(1E,3E)-4-Hydroxybuta-1,3-diene-1,2,4-tricarboxylate = 4-Carboxy-2-hydroxymuconate semialdehyde	C04324 = C04484 + C00001	1	-544.473	-552.867		NA
N-Acetyl-L-glutamate = N-Acetyl-L-glutamate 5-semialdehyde	C00624 = C01250 + C00001	1	-554.381	-544.18		NA
4-Trimethylammoniobutanoate = 4-Trimethylammoniobutanal	C01181 = C01149 + C00001	1	-540.995	-527.723		NA
Heptanoic acid = Heptanal	C17714 = C14390 + C00001	1	-543.946	-536.172		NA
4-Hydroxybenzoate = 4-Hydroxybenzaldehyde	C00156 = C00633 + C00001	1	-526.261	-527.818		NA
Benzoate = Benzaldehyde	C00180 = C00261 + C00001	1	-536.727	-536.086		NA
6-Phospho-D-gluconate = D-Glucose 6-phosphate	C00345 = C00092 + C00001	1	-488.32	-502.966	-465.906	NA
D-Ribulose = Ribitol	C00309 = C00474	2	-229.073	-242.697	-232.666	TRUE
1-Deoxy-D-xylulose 5-phosphate = 2-C-Methyl-D-erythritol 4-phosphate	C11437 = C11434	2	-229.249	-219.22		TRUE
D-Xylulose = Xylitol	C00310 = C00379	2	-238.64	-242.697		TRUE
L-Arabinose = L-Arabitol	C00259 = C00532	2	-266.907	-245.982		TRUE
L-Xylulose = Xylitol	C00312 = C00379	2	-241.833	-242.697	-232.376	TRUE
2-Oxopropyl-CoM = (S)-2-Hydroxypropyl-CoM	C11497 = C11498	2	-237.098	-227.444		TRUE
5-Hydroxy-2,4-dioxopentanoate = 2-Dehydro-3-deoxy-D-xylonate	C05406 = C03826	2	-237.2	-228.127		TRUE
D-Xylose-5-phosphate = Xylitol 5-phosphate	C06814 = C02895	2	-176.557	-214.606		FALSE
2-Oxoglutarate = (S)-2-Hydroxyglutarate	C00026 = C03196	2	-192.112	-227.441	-166.348	FALSE
2-Oxopropyl-CoM = (R)-2-Hydroxypropyl-CoM	C11497 = C11496	2	-253.58	-227.444		TRUE
D-Arabinono-1,4-lactone = D-Arabinose	C00652 = C00216	2	-330.545	-384.855		TRUE
2-Oxoglutarate = (R)-2-Hydroxyglutarate	C00026 = C01087	2	-198.784	-227.441	-188.927	TRUE
3-Hydroxy-3-methyl-2-oxobutanoic acid = (R)-2,3-Dihydroxy-3-methylbutanoate	C04181 = C04272	2	-192.194	-227.44		TRUE
Acetylpyruvate = 4-Hydroxy-2-oxopentanoate	C02132 = C03589	2	-251.361	-228.142		FALSE
4-Oxoproline = cis-4-Hydroxy-L-proline	C01877 = C01015	2	-130.19	-307.917		FALSE
D-Xylonolactone = D-Xylose	C02266 = C00181	2	-298.812	-394.649		TRUE
2,5-Didehydro-D-gluconate = 2-Dehydro-L-idonate	C02780 = C15673	2	-224.18	-227.45	-175.067	TRUE
myo-Inosose-5 = myo-Inositol	C17577 = C00137	2	-158.697	-302.045		FALSE
Imidazol-5-yl-pyruvate = (S)-3-(Imidazol-5-yl)lactate	C03277 = C03817	2	-172.951	-227.13		TRUE
2,5-Didehydro-D-gluconate = 2-Keto-D-gluconic acid	C02780 = C06473	2	-210.108	-227.45		TRUE
Galactose = Galactitol	C01582 = C01697	2	-205.695	-214.606		FALSE
3-Dehydro-L-gulonate = L-Gulonate	C00618 = C00800	2	-229.207	-227.614		TRUE
Cyclohexane-1,2-dione = 2-Hydroxycyclohexan-1-one	C06105 = C01147	2	-174.42	-301.642		TRUE
5-Dehydro-D-fructose = D-Fructose	C00273 = C10906	2	-232.836	-227.514		TRUE
L-Histidinal = L-Histidinol	C01929 = C00860	2	-70.6916	-215.433		TRUE
2-Keto-D-gluconic acid = D-Gluconic acid	C06473 = C00257	2	-162.414	-227.443	-239.818	TRUE
2-Dehydro-D-galactonate = D-Galactonate	C03342 = C00880	2	-191.748	-227.443		FALSE
2-Dehydropantoate = (R)-Pantoate	C00966 = C00522	2	-184.927	-227.439	-232.832	TRUE
2-Dehydro-L-idonate = L-Idonate	C15673 = C00770	2	-172.269	-227.443		TRUE
D-Glucono-1,5-lactone 6-phosphate = beta-D-Glucose 6-phosphate	C01236 = C01172	2	-313.673	-394.766		TRUE
D-Glucono-1,5-lactone = beta-D-Glucose	C00198 = C00221	2	-324.483	-394.649		TRUE
5-Dehydro-4-deoxy-D-glucuronate = 3-Dehydro-2-deoxy-D-gluconate	C04053 = C03926	2	-167.461	-214.598		FALSE
Dihydro-4,4-dimethyl-2,3-furandione = (R)-Pantolactone	C01125 = C01012	2	-194.117	-301.642		TRUE
(4R,5S)-4,5,6-Trihydroxy-2,3-dioxohexanoate = 3-Dehydro-L-gulonate	C04575 = C00618	2	-140.082	-227.388		TRUE
D-Glucuronolactone = D-Glucono-1,4-lactone	C02670 = C03107	2	-203.212	-214.606		FALSE
D-arabino-Hex-3-ulose 6-phosphate = D-Mannitol 1-phosphate	C06019 = C00644	2	-188.724	-227.427	-203.112	FALSE
D-Glucose = D-Sorbitol	C00031 = C00794	2	-238.026	-264.612	-270.974	TRUE
Adipate semialdehyde = 6-Hydroxyhexanoic acid	C06102 = C06103	2	-232.486	-214.592		TRUE
(R)-4-Dehydropantoate = (R)-Pantoate	C01053 = C00522	2	-210.969	-214.604		TRUE
3-Keto-beta-D-galactose = beta-D-Galactose	C05394 = C00962	2	-210.932	-301.652		FALSE
2,4,6/3,5-Pentahydroxycyclohexanone = scyllo-Inositol	C00691 = C06153	2	-225.39	-302.045		TRUE
L-Rhamnono-1,4-lactone = L-Rhamnofuranose	C02991 = C02431	2	-360.249	-394.649		TRUE
Aldohexose 6-phosphate = Alditol 6-phosphate	C03251 = C02810	2	-163.3	-214.606		FALSE
3-Hexenal = 3-Hexenol	C16310 = C08492	2	-223.127	-214.606	-199.039	FALSE
3-Keto-scyllo-inosamine = 1-Amino-1-deoxy-scyllo-inositol	C17576 = C01214	2	-207.393	-302.371		FALSE
6-Phospho-2-dehydro-D-gluconate = 6-Phospho-D-gluconate	C01218 = C00345	2	-179.885	-227.445		TRUE
2-Formylglutarate = (S)-2-(Hydroxymethyl)glutarate	C16159 = C16390	2	-203.644	-214.602		TRUE
2,5-Didehydro-D-gluconate = 5-Dehydro-D-gluconate	C02780 = C01062	2	-151.162	-227.42		TRUE
2-Deoxy-5-keto-D-gluconic acid = 2-Deoxy-D-gluconate	C06892 = C02782	2	-224.23	-227.442		FALSE
Sorbose 1-phosphate = Sorbitol 6-phosphate	C02888 = C01096	2	-200.876	-226.928		TRUE
L-Fucono-1,5-lactone = 6-Deoxy-L-galactose	C18028 = C01019	2	-266.236	-394.649		TRUE
2-Dehydro-D-glucose = beta-D-Glucose	C02779 = C00221	2	-217.455	-301.897		FALSE
D-Glucuronate = L-Gulonate	C00191 = C00800	2	-266.653	-264.612		TRUE
alpha-D-Glucose = D-Sorbitol	C00267 = C00794	2	-238.343	-264.612		TRUE
D-Mannose = Mannitol	C00159 = C00392	2	-241.902	-264.612		TRUE
D-Fructose 6-phosphate = D-Mannitol 1-phosphate	C00085 = C00644	2	-269.963	-260.861	-276.266	TRUE
Ethyl 3-oxobutanoate = Ethyl (R)-3-hydroxybutanoate	C03500 = C03499	2	-233.721	-227.473		FALSE
Sorbose = D-Iditol	C01452 = C01489	2	-234.643	-227.525		FALSE
D-Galactono-1,5-lactone = D-Galactose	C02669 = C00124	2	-356.217	-394.649		TRUE
5-Dehydro-D-fructose = D-Fructose	C00273 = C00095	2	-210.338	-193.711	-228.118	TRUE
D-Galactono-1,4-lactone = D-Galactose	C03383 = C00124	2	-369.074	-366.225		TRUE
L-Fructose = L-Glucitol	C01719 = C01722	2	-240.42	-261.327		TRUE
D-Tagatose = Galactitol	C00795 = C01697	2	-265.518	-271.121	-274.625	TRUE
D-Fructose 6-phosphate = Sorbitol 6-phosphate	C00085 = C01096	2	-278.555	-260.861	-253.258	TRUE
D-Tagaturonate = D-Altronate	C00558 = C00817	2	-265.599	-261.338		TRUE
D-Glucono-1,4-lactone = D-Glucose	C03107 = C00031	2	-352.385	-366.225		TRUE
D-Mannose 6-phosphate = D-Mannitol 1-phosphate	C00275 = C00644	2	-237.648	-264.116		TRUE
5-Dehydro-D-fructose = L-Sorbose	C00273 = C00247	2	-177.41	-183.918		TRUE
L-Tagatose 6-phosphate = Galactitol 1-phosphate	C06312 = C06311	2	-273.996	-260.861		TRUE
D-Glucono-1,5-lactone 6-phosphate = D-Glucose 6-phosphate	C01236 = C00092	2	-330.226	-394.766		TRUE
Sorbose = L-Glucitol	C01452 = C01722	2	-223.202	-227.525		FALSE
D-Tagatose 6-phosphate = Galactitol 1-phosphate	C01097 = C06311	2	-300.444	-260.861		TRUE
Cyclohexanone = Cyclohexanol	C00414 = C00854	2	-262.371	-301.642	-290.075	TRUE
3-Dehydro-2-deoxy-D-gluconate = 2-Deoxy-D-gluconate	C03926 = C02782	2	-209.447	-227.445	-185.697	TRUE
(R)-3-Hydroxy-3-methyl-2-oxopentanoate = (R)-2,3-Dihydroxy-3-methylpentanoate	C14463 = C06007	2	-201.486	-227.439		TRUE
D-Fructose = D-Sorbitol	C00095 = C00794	2	-236.475	-261.327	-271.468	TRUE
beta-D-Fructose 6-phosphate = Sorbitol 6-phosphate	C05345 = C01096	2	-267.267	-260.861		TRUE
Mevaldate = (R)-Mevalonate	C00772 = C00418	2	-189.561	132.241		TRUE
beta-D-Fructose 6-phosphate = D-Mannitol 1-phosphate	C05345 = C00644	2	-256.595	-260.861		TRUE
L-Sorbosone = L-Sorbose	C19679 = C00247	2	-103.001	-171.508		TRUE
D-Glucose 6-phosphate = Sorbitol 6-phosphate	C00092 = C01096	2	-251.724	-264.116	-266.339	TRUE
L-Sorbose = D-Sorbitol	C00247 = C00794	2	-270.534	-271.121		TRUE
D-Fructuronate = D-Mannonate	C00905 = C00514	2	-236.77	-261.338		TRUE
D-Galactose = Galactitol	C00124 = C01697	2	-235.279	-264.612		TRUE
D-Galacturonate = L-Galactonate	C00333 = C15930	2	-250.567	-264.612		TRUE
L-Sorbose = L-Iditol	C00247 = C01507	2	-279.592	-271.121	-268.017	TRUE
D-Fructose = Mannitol	C00095 = C00392	2	-233.814	-261.327	-280.371	TRUE
L-Galactono-1,4-lactone = L-Galactose	C01115 = C01825	2	-322.4	-366.225		TRUE
D-Sorbose = D-Iditol	C00764 = C01489	2	-257.908	-271.121		TRUE
D-Mannuronate = D-Mannonate	C02024 = C00514	2	-249.777	-264.612		TRUE
3-Dehydrocarnitine = L-Carnitine	C02636 = C00318	2	-217.563	-227.435	-209.702	FALSE
2-Hydroxy-5-methylquinone = 2,4,5-Trihydroxytoluene	C18316 = C18317	2	-157.985	542.937		TRUE
4-Sulfobenzaldehyde = 4-Sulfobenzyl alcohol	C06679 = C06678	2	-254.177	-214.606		TRUE
Salicylaldehyde = Salicyl alcohol	C06202 = C02323	2	-277.992	-215.523		FALSE
5-Dehydroshikimate = Shikimate	C02652 = C00493	2	-216.126	-301.64	-281.68	FALSE
(1S,4S)-4-Hydroxy-3-oxocyclohexane-1-carboxylate = (1S,3R,4S)-3,4-Dihydroxycyclohexane-1-carboxylate	C04670 = C04687	2	-265.88	-301.638		TRUE
3-Hydroxybenzaldehyde = 3-Hydroxybenzyl alcohol	C03067 = C03351	2	-260.445	-214.784	-286.01	TRUE
3-Dehydroshikimate = Shikimate	C02637 = C00493	2	-268.111	-85.5611		TRUE
4-Hydroxybenzaldehyde = p-Hydroxybenzyl alcohol	C00633 = C17467	2	-282.9	-222.901		FALSE
Benzaldehyde = Benzyl alcohol	C00261 = C00556	2	-262.241	-214.606	-226.419	TRUE
Gentisate aldehyde = Gentisyl alcohol	C05585 = C10792	2	-275.368	-214.981		FALSE
2D-5-O-Methyl-2,3,5/4,6-pentahydroxycyclohexanone = 5-O-Methyl-myo-inositol	C01295 = C03365	2	-207.311	-301.686		TRUE
3-Dehydroquinate = Quinate	C00944 = C00296	2	-222.311	-301.642	-248.169	TRUE
1D-1-Guanidino-1-deoxy-3-dehydro-scyllo-inositol = 1-Guanidino-1-deoxy-scyllo-inositol	C04673 = C04280	2	-227.208	-301.66		FALSE
2D-5-O-Methyl-2,3,5/4,6-pentahydroxycyclohexanone = D-Pinitol	C01295 = C03844	2	-225.061	-301.686		TRUE
2-Pyrone-4,6-dicarboxylate = 2-Hydroxy-2-hydropyrone-4,6-dicarboxylate	C03671 = C05375	2	-374.767	1406.06		TRUE
3-Dehydrocarnitine = (S)-Carnitine	C02636 = C15025	2	-217.276	-227.435	-196.447	TRUE
Formaldehyde = Methanol	C00067 = C00132	2	-173.224		-157.1	TRUE
Acetaldehyde = Ethanol	C00084 = C00469	2	-233.669	-214.606	-222.089	TRUE
Glyoxylate = Glycolate	C00048 = C00160	2	-158.099	-214.604	-103.336	TRUE
Sulfoacetaldehyde = 2-Hydroxyethanesulfonate	C00593 = C05123	2	-214.863	-214.606		TRUE
Phosphonoacetaldehyde = 2-Hydroxyethylphosphonate	C03167 = C06451	2	-198.668	-214.98		TRUE
Glycolaldehyde = Ethylene glycol	C00266 = C01380	2	-216.999	-214.606		TRUE
Aminoacetaldehyde = Ethanolamine	C06735 = C00189	2	-188.093	-216.419		FALSE
Glyoxal = Glycolaldehyde	C14448 = C00266	2	-149.879	-214.606		FALSE
D-Glyceraldehyde = Glycerol	C00577 = C00116	2	-199.917	-214.606	-129.325	TRUE
Glycerone = Glycerol	C00184 = C00116	2	-217.638	-227.444	-207.054	TRUE
2-Propynal = 2-Propyn-1-ol	C05985 = C05986	2	-201.945	-214.606		TRUE
Acrolein = Allyl alcohol	C01471 = C02001	2	-256.92	-214.606		TRUE
3-Hydroxypropanal = Propane-1,3-diol	C00969 = C02457	2	-228.515	-214.606		TRUE
Chloroacetaldehyde = 2-Chloroethanol	C06754 = C06753	2	-193.071	-214.606		TRUE
Acetone = Propan-2-ol	C00207 = C01845	2	-269.893	-227.444	-295.657	TRUE
Oxomalonate = Hydroxymalonate	C00830 = C02287	2	-146.931	-227.423		TRUE
Hydroxypyruvaldehyde phosphate = Glycerone phosphate	C16849 = C00111	2	-162.405	-214.535		FALSE
Hydroxypyruvate = D-Glycerate	C00168 = C00258	2	-178.711	-227.442	-169.311	TRUE
(S)-Lactaldehyde = Propane-1,2-diol	C00424 = C00583	2	-213.845	-214.606	-166.121	TRUE
Mercaptopyruvate = 3-Mercaptolactate	C00957 = C05823	2	-205.038	-227.504		TRUE
Glycidaldehyde = Glycidol	C19246 = C10920	2	-208.84	-214.606		FALSE
Glycerone phosphate = sn-Glycerol 3-phosphate	C00111 = C00093	2	-225.137	-226.881	-197.758	TRUE
3-Oxopropanoate = 3-Hydroxypropanoate	C00222 = C01013	2	-210.509	-214.599	-210.886	TRUE
Butanal = 1-Butanol	C01412 = C06142	2	-232.933	-214.606	-208.767	TRUE
Propanal = Propane-1-ol	C00479 = C05979	2	-234.327	-214.606		TRUE
Oxalureate = (-)-Ureidoglycolate	C00802 = C00603	2	-377.131	-616.725		TRUE
Methylglyoxal = Hydroxyacetone	C00546 = C05235	2	-173.675	-214.606		TRUE
(R)-Lactaldehyde = (R)-Propane-1,2-diol	C00937 = C02912	2	-210.19	-214.606		TRUE
3-Sulfopyruvate = (S)-3-Sulfolactate	C05528 = C11499	2	-156.453	-227.444		TRUE
Methylglyoxal = (S)-Lactaldehyde	C00546 = C00424	2	-198.641	-227.444		TRUE
2-Hydroxy-3-oxopropanoate = D-Glycerate	C01146 = C00258	2	-195.858	-214.605	-162.022	TRUE
Methylglyoxal = (R)-Lactaldehyde	C00546 = C00937	2	-201.667	-227.444		TRUE
Hydroxyacetone phosphate = Propane-1,2-diol 1-phosphate	C03505 = C03894	2	-240.744	-226.747		TRUE
3-Sulfopyruvate = (2R)-3-Sulfolactate	C05528 = C11537	2	-156.506	-227.444		TRUE
3-Sulfopyruvate = (2R)-3-Sulfolactate	C05528 = C11537	2	-156.506	-227.444		TRUE
3-Sulfopyruvate = (2R)-3-Sulfolactate	C05528 = C11537	2	-156.506	-227.444		TRUE
3-Sulfopyruvate = (2R)-3-Sulfolactate	C05528 = C11537	2	-156.506	-227.444		TRUE
2-Aminomalonate semialdehyde = L-Serine	C11822 = C00065	2	-142.302	-224.846		TRUE
Pyruvate = (S)-Lactate	C00022 = C00186	2	-205.181	-227.44	-191.999	TRUE
D-Glyceraldehyde 3-phosphate = sn-Glycerol 3-phosphate	C00118 = C00093	2	-205.714	-214.363	-169.277	TRUE
Hydroxyacetone = (R)-Propane-1,2-diol	C05235 = C02912	2	-240.595	-227.444		FALSE
Hydroxyacetone = Propane-1,2-diol	C05235 = C00583	2	-239.737			TRUE
Aminoacetone = (R)-1-Aminopropan-2-ol	C01888 = C03194	2	-236.986	-229.145		TRUE
Pyruvate = (R)-Lactate	C00022 = C00256	2	-206.938	-227.44	-207.901	TRUE
Hydroxypyruvaldehyde phosphate = D-Glyceraldehyde 3-phosphate	C16849 = C00118	2	-182.942	-227.054		FALSE
L-Glyceraldehyde = Glycerol	C02426 = C00116	2	-196.765	-214.606		TRUE
Diacetyl = (R)-Acetoin	C00741 = C00810	2	-202.942	-227.444		TRUE
Acetoacetate = (R)-3-Hydroxybutanoate	C00164 = C01089	2	-242.391	-227.434	-274.694	TRUE
3-Dehydro-L-threonate = Threonate	C03064 = C01620	2	-237.922	-227.446	-238.958	TRUE
2-Oxo-3-hydroxy-4-phosphobutanoate = 4-Phospho-D-erythronate	C06054 = C03393	2	-157.985	-227.271		TRUE
Oxaloacetate = (S)-Malate	C00036 = C00149	2	-203.592	-227.398	-177.206	TRUE
2-Oxobutanoate = 2-Hydroxybutanoic acid	C00109 = C05984	2	-221.971	-227.438	-235.408	TRUE
Diacetyl = (S)-Acetoin	C00741 = C01769	2	-201.011	-227.444		TRUE
(R)-Acetoin = (R,R)-Butane-2,3-diol	C00810 = C03044	2	-260.883	-227.444	-252.684	TRUE
L-Aspartate 4-semialdehyde = L-Homoserine	C00441 = C00263	2	-233.843	-214.692	-215.591	TRUE
Succinate semialdehyde = 4-Hydroxybutanoic acid	C00232 = C00989	2	-227.592	-214.597	-333.445	TRUE
L-2-Amino-3-oxobutanoic acid = L-Allothreonine	C03508 = C05519	2	-241.133	-236.609		FALSE
2-Hydroxy-3-oxosuccinate = meso-Tartaric acid	C03459 = C00552	2	-190.952	-227.423	-126.265	TRUE
2-Methyl-3-oxopropanoate = 3-Hydroxy-2-methylpropanoate	C00349 = C01188	2	-208.123	-214.597	-223.749	TRUE
cis-3-Chloroallyl aldehyde = cis-3-Chloro-2-propene-1-ol	C16348 = C06612	2	-240.416	-214.606		TRUE
Acetoacetate = (S)-3-Hydroxybutanoate	C00164 = C03197	2	-241.749	-227.434		TRUE
D-Erythrulose = Erythritol	C02022 = C00503	2	-226.162	-227.444		FALSE
Erythrulose 1-phosphate = D-Erythritol 4-phosphate	C03394 = C03494	2	-210.965	-226.894		FALSE
trans-3-Chloroallyl aldehyde = trans-3-Chloro-2-propene-1-ol	C06613 = C06611	2	-249.655	-214.606		TRUE
L-Erythrulose = Erythritol	C02045 = C00503	2	-225.131	-227.444		FALSE
D-Erythrulose 4-phosphate = D-Erythritol 4-phosphate	C03604 = C03494	2	-202.291	-227.205		FALSE
(S)-Methylmalonate semialdehyde = (S)-3-Hydroxyisobutyrate	C06002 = C06001	2	-208.014	-214.597		TRUE
D-Erythrose 4-phosphate = D-Erythritol 4-phosphate	C00279 = C03494	2	-191.108	-214.582		FALSE
Oxaloacetate = (R)-Malate	C00036 = C00497	2	-206.313	-227.398	-129.267	FALSE
L-2-Amino-3-oxobutanoic acid = L-Threonine	C03508 = C00188	2	-241.248	-236.609		TRUE
3-Butyn-1-al = 3-Butyn-1-ol	C06145 = C06146	2	-211.138	-214.606		FALSE
3-Methyl-2-butenal = Prenol	C07330 = C01390	2	-287.469	-214.606		FALSE
3-Methylbutanal = 3-Methylbutanol	C07329 = C07328	2	-235.626	-214.606		TRUE
2-Dehydro-D-xylonate = D-Xylonate	C02928 = C00502	2	-181.36	-227.443		FALSE
Uracil 5-carbaldehyde = 5-Hydroxymethyluracil	C17206 = C03088	2	-236.95	-214.609		TRUE
Chloral = Trichloroethanol	C14866 = C07490	2	-153.169	-214.606		TRUE
L-Xylono-1,4-lactone = L-Xylose	C02994 = C01510	2	-345.637	-394.649		TRUE
4-Oxoproline = Hydroxyproline	C01877 = C01157	2	-113.958	-307.917		TRUE
D-Apiose = D-Apiitol	C01488 = C01569	2	-210.497	-214.606		TRUE
L-Ribulose = L-Arabitol	C00508 = C00532	2	-244.805	-242.697		TRUE
Methyloxaloacetate = L-threo-3-Methylmalate	C06030 = C06029	2	-210.097	-227.383		FALSE
5-Hydroxy-2,4-dioxopentanoate = 2-Dehydro-3-deoxy-L-arabinonate	C05406 = C00684	2	-236.733	-228.127		FALSE
D-Xylulose 5-phosphate = Xylitol 5-phosphate	C00231 = C02895	2	-214.842	-227.399		FALSE
L-Arabinose = L-Arabitol	C11476 = C00532	2	-196.798	-214.606		FALSE
D-Ribulose 5-phosphate = D-Ribitol 5-phosphate	C00199 = C01068	2	-229.237	-227.399		TRUE
4-Guanidinobutanal = 4-Guanidino-1-butanol	C02647 = C17146	2	-222.412	-214.606		FALSE
Methyloxaloacetate = D-erythro-3-Methylmalate	C06030 = C06032	2	-218.874	-227.383		FALSE
Betaine aldehyde = Choline	C00576 = C00114	2	-191.7	-214.606		TRUE
5-Oxopentanoate = 5-Hydroxypentanoate	C03273 = C02804	2	-230.697	-214.594		FALSE
Cyclopentanone = Cyclopentanol	C00557 = C02020	2	-293.23	-301.642		TRUE
D-Ribulose = D-Arabitol	C00309 = C01904	2	-229.47	-242.697	-238.826	TRUE
D-Xylulose = D-Arabitol	C00310 = C01904	2	-243.093	-242.697		TRUE
L-Xylulose = L-Arabitol	C00312 = C00532	2	-249.183	-242.697		TRUE
D-Xylose = Xylitol	C00181 = C00379	2	-275.375	-245.982	-249.227	TRUE
Indolepyruvate = Indolelactate	C00331 = C02043	2	-202.228	-227.437	-407.099	TRUE
Estrone = Estradiol-17beta	C00468 = C00951	2	-284.343	-301.642	-308.76	TRUE
Coniferyl aldehyde = Coniferyl alcohol	C02666 = C00590	2	-290.386	-214.655	-279.437	TRUE
Sepiapterin = 7,8-Dihydrobiopterin	C00835 = C02953	2	-302.233	-231.271	-265.157	TRUE
1-Octanal = 1-Octanol	C01545 = C00756	2	-232.518	-214.606	-204.481	TRUE
Pyridoxal = Pyridoxine	C00250 = C00314	2	-181.105	-216.451	-192.795	TRUE
5-Amino-2-oxopentanoic acid = L-Ornithine	C01110 + C00014 = C00077 + C00001	3	-235.8	-249.792		NA
L-Glutamate 5-semialdehyde = L-Ornithine	C01165 + C00014 = C00077 + C00001	3	-244.353	-212.186		NA
5-Aminopentanal = Cadaverine	C12455 + C00014 = C01672 + C00001	3	-213.991	-203.656		NA
3-Methyl-2-oxobutanoic acid = L-Valine	C00141 + C00014 = C00183 + C00001	3	-234.072	-258.129		NA
2-Oxoglutarate = D-Glutamate	C00026 + C00014 = C00217 + C00001	3	-237.824	-266.436	-233.773	NA
4-Methylaminobutanal = N-Methylputrescine	C10974 + C00014 = C02723 + C00001	3	-212.77	-203.652		NA
4-Methylthio-2-oxobutanoic acid = L-Methionine	C01180 + C00014 = C00073 + C00001	3	-237.175	-258.113		NA
5-Amino-2-oxopentanoic acid = D-Ornithine	C01110 + C00014 = C00515 + C00001	3	-236.958	-249.792		NA
2-Amino-4-oxopentanoic acid = (2R,4S)-2,4-Diaminopentanoate	C03341 + C00014 = C03943 + C00001	3	-290.943	-249.396	-260.992	NA
Acetylpyruvate = 2-Amino-4-oxopentanoic acid	C02132 + C00014 = C03341 + C00001	3	-217.833	-258.633		NA
2-Oxoglutarate = L-Glutamate	C00026 + C00014 = C00025 + C00001	3	-222.083	-266.436	-230.572	NA
2,5-Dioxopentanoate = 5-Amino-2-oxopentanoic acid	C00433 + C00014 = C01110 + C00001	3	-219.255	-220.394		NA
4-Oxoglutaramate = Isoglutamine	C05572 + C00014 = C16673 + C00001	3	-248.723	-257.689		NA
4,5-Dioxopentanoate = 5-Aminolevulinate	C02800 + C00014 = C00430 + C00001	3	-212.447	-217.28		NA
Imidazole-4-acetaldehyde = Histamine	C05130 + C00014 = C00388 + C00001	3	-175.04	-210.149		NA
5-Oxopentanoate = 5-Aminopentanoate	C03273 + C00014 = C00431 + C00001	3	-225.646	-220.377		NA
Glutaral = 5-Aminopentanal	C12518 + C00014 = C12455 + C00001	3	-215.926	-212.031		NA
3-Methylbutanal = 3-Methylbutanamine	C07329 + C00014 = C02640 + C00001	3	-220.611	-212.035		NA
4-Guanidinobutanal = Agmatine	C02647 + C00014 = C00179 + C00001	3	-213.162	-203.64		NA
4-Methyl-2-oxopentanoate = D-Leucine	C00233 + C00014 = C01570 + C00001	3	-230.812	-258.117	-234.667	NA
6-Amino-2-oxohexanoate = D-Lysine	C03239 + C00014 = C00739 + C00001	3	-229.378	-249.777		NA
2-Oxohexanoic acid = L-Norleucine	C00902 + C00014 = C01933 + C00001	3	-231.019	-258.119		NA
N-Methyl-2-oxoglutaramate = N5-Methyl-L-glutamine	C03623 + C00014 = C03153 + C00001	3	-236.204	-252.567		NA
5-Guanidino-2-oxopentanoate = L-Arginine	C03771 + C00014 = C00062 + C00001	3	-229.767	-249.702		NA
2-Oxoadipate = L-2-Aminoadipate	C00322 + C00014 = C00956 + C00001	3	-238.764	-266.429	-234.283	NA
3-(Imidazol-4-yl)-2-oxopropyl phosphate = L-Histidinol phosphate	C01267 + C00014 = C01100 + C00001	3	-277.106	-263.549	-270.006	NA
myo-Inosose-5 = neo-Inosamine-2	C17577 + C00014 = C17578 + C00001	3	-208.634	-337.471		NA
2-Amino-5-oxohexanoate = 2,5-Diaminohexanoate	C05825 + C00014 = C05161 + C00001	3	-266.637	-249.944		NA
Cyclohexanone = Cyclohexylamine	C00414 + C00014 = C00571 + C00001	3	-242.66	-337.705		NA
Methylimidazole acetaldehyde = N-Methylhistamine	C05827 + C00014 = C05127 + C00001	3	-224.224	-211.529		NA
(S)-5-Amino-3-oxohexanoic acid = (3S,5S)-3,5-Diaminohexanoate	C03656 + C00014 = C01186 + C00001	3	-268.263	-249.671	-327.315	NA
(S)-3-Methyl-2-oxopentanoic acid = L-Isoleucine	C00671 + C00014 = C00407 + C00001	3	-232.022	-258.128		NA
(3R)-3-Methyl-2-oxopentanoic acid = D-Isoleucine	C06008 + C00014 = C06418 + C00001	3	-232.105	-258.128		NA
Imidazol-5-yl-pyruvate = L-Histidine	C03277 + C00014 = C00135 + C00001	3	-240.505	-256.654		NA
L-2-Aminoadipate 6-semialdehyde = L-Lysine	C04076 + C00014 = C00047 + C00001	3	-224.517	-212.111		NA
3-Amino-2,3-dideoxy-scyllo-inosose = 2-Deoxystreptamine	C17581 + C00014 = C02627 + C00001	3	-238.883	-328.336		NA
N4-Acetylaminobutanal = N-Acetylputrescine	C05936 + C00014 = C02714 + C00001	3	-168.812	-211.257		NA
2-Keto-D-gluconic acid = 2-Amino-2-deoxy-D-gluconate	C06473 + C00014 = C03752 + C00001	3	-200.837	-257.036		NA
2-Deoxy-scyllo-inosose = 2-Deoxy-scyllo-inosamine	C17209 + C00014 = C17580 + C00001	3	-236.016	-337.52		NA
Imidazol-5-yl-pyruvate = D-Histidine	C03277 + C00014 = C06419 + C00001	3	-241.472	-256.654		NA
beta-Ketoisocaproate = (3R)-beta-Leucine	C03467 + C00014 = C02486 + C00001	3	-255.818	-258.168		NA
4-Methyl-2-oxopentanoate = L-Leucine	C00233 + C00014 = C00123 + C00001	3	-231.909	-258.117	-234.666	NA
2-Oxo-5-methylthiopentanoic acid = Homomethionine	C17211 + C00014 = C17213 + C00001	3	-228.751	-258.119		NA
5-Guanidino-2-oxopentanoate = D-Arginine	C03771 + C00014 = C00792 + C00001	3	-229.341	-249.702		NA
2-Dehydro-D-glucose = beta-D-Glucosamine	C02779 + C00014 = C08349 + C00001	3	-224.323	-337.231		NA
Adipate semialdehyde = 6-Aminohexanoate	C06102 + C00014 = C02378 + C00001	3	-227.511	-220.372		NA
3-Keto-scyllo-inosamine = Streptamine	C17576 + C00014 = C01854 + C00001	3	-242.055	-326.702		NA
L-2-Amino-6-oxoheptanedioate = meso-2,6-Diaminoheptanedioate	C03871 + C00014 = C00680 + C00001	3	-237.339	-258.266		NA
1D-1-Guanidino-1-deoxy-3-dehydro-scyllo-inositol = 1D-1-Guanidino-3-amino-1,3-dideoxy-scyllo-inositol	C04673 + C00014 = C01298 + C00001	3	-239.33	-328.405		NA
L-2-Amino-6-oxoheptanedioate = LL-2,6-Diaminoheptanedioate	C03871 + C00014 = C00666 + C00001	3	-236.422	-258.266		NA
5-Dehydroshikimate = 5-Deoxy-5-aminoshikimic acid	C02652 + C00014 = C12121 + C00001	3	-236.101	-346.007		NA
Benzaldehyde = Benzylamine	C00261 + C00014 = C15562 + C00001	3	-242.255	-212.004		NA
Formaldehyde = Methylamine	C00067 + C00014 = C00218 + C00001	3	-172.668			NA
Phosphonoacetaldehyde = 2-Aminoethylphosphonate	C03167 + C00014 = C03557 + C00001	3	-222.578	-221.235	-215.597	NA
Glyoxal = Aminoacetaldehyde	C14448 + C00014 = C06735 + C00001	3	-185.703	-210.195		NA
Acetaldehyde = Ethylamine	C00084 + C00014 = C00797 + C00001	3	-218.947	-212.036		NA
Glycolaldehyde = Ethanolamine	C00266 + C00014 = C00189 + C00001	3	-211.86	-212.007		NA
Glyoxylate = Glycine	C00048 + C00014 = C00037 + C00001	3	-192.884	-220.294	-186.782	NA
Sulfoacetaldehyde = Taurine	C00593 + C00014 = C00245 + C00001	3	-201.898	-220.323		NA
2-Aminomalonate semialdehyde = 3-Amino-L-alanine	C11822 + C00014 = C03401 + C00001	3	-224.448	-182.889		NA
Mercaptopyruvate = L-Cysteine	C00957 + C00014 = C00097 + C00001	3	-230.173	-258.088		NA
Mercaptopyruvate = D-Cysteine	C00957 + C00014 = C00793 + C00001	3	-230.884	-258.088		NA
3-Phosphonooxypyruvate = O-Phospho-L-serine	C03232 + C00014 = C01005 + C00001	3	-202.308	-273.865	-173.099	NA
Hydroxypyruvate = D-Serine	C00168 + C00014 = C00740 + C00001	3	-210.199	-257.903		NA
3-Sulfopyruvate = L-Cysteate	C05528 + C00014 = C00506 + C00001	3	-199.092	-265.835		NA
D-Glyceraldehyde = 3-Aminopropane-1,2-diol	C00577 + C00014 = C06057 + C00001	3	-202.12	-211.966		NA
(R)-Lactaldehyde = (R)-1-Aminopropan-2-ol	C00937 + C00014 = C03194 + C00001	3	-208.707	-212.011		NA
Pyruvate = L-Alanine	C00022 + C00014 = C00041 + C00001	3	-231.522	-258.109	-229.686	NA
3-Phosphonooxypyruvate = O-Phospho-D-serine	C03232 + C00014 = C02532 + C00001	3	-202.958	-273.865		NA
Hydroxypyruvate = L-Serine	C00168 + C00014 = C00065 + C00001	3	-208.341	-257.903	-208.974	NA
Pyruvate = D-Alanine	C00022 + C00014 = C00133 + C00001	3	-231.774	-258.109	-229.479	NA
3-Phosphonopyruvate = 2-Amino-3-phosphonopropanoate	C02798 + C00014 = C05672 + C00001	3	-231.54	-267.498		NA
Hydroxypyruvaldehyde phosphate = 3-Amino-2-oxopropyl phosphate	C16849 + C00014 = C11638 + C00001	3	-210.55	-222.387		NA
Methylglyoxal = Aminoacetone	C00546 + C00014 = C01888 + C00001	3	-187.372	-210.31		NA
Oxomalonate = Aminomalonate	C00830 + C00014 = C00872 + C00001	3	-206.401	-265.16		NA
3-Oxopropanoate = beta-Alanine	C00222 + C00014 = C00099 + C00001	3	-214.664	-220.412	-250.399	NA
Acetone = Isopropylamine	C00207 + C00014 = C06748 + C00001	3	-249.649	-249.793		NA
3-Aminopropanal = 1,3-Diaminopropane	C05665 + C00014 = C00986 + C00001	3	-226.879	-203.549	-216.583	NA
2-Hydroxy-3-oxosuccinate = D-erythro-3-Hydroxyaspartate	C03459 + C00014 = C19838 + C00001	3	-232.334	-266.192	-264.569	NA
Oxaloacetate = L-Aspartate	C00036 + C00014 = C00049 + C00001	3	-237.177	-266.382	-215.62	NA
2-Oxo-3-hydroxy-4-phosphobutanoate = O-Phospho-4-hydroxy-L-threonine	C06054 + C00014 = C06055 + C00001	3	-230.875	-273.146		NA
L-Aspartate 4-semialdehyde = L-2,4-Diaminobutanoate	C00441 + C00014 = C03283 + C00001	3	-250.45	-211.611		NA
Oxaloacetate = D-Aspartate	C00036 + C00014 = C00402 + C00001	3	-242.38	-266.382		NA
2-Oxosuccinamate = D-Asparagine	C02362 + C00014 = C01905 + C00001	3	-210.426	-258.113		NA
2-Oxobutanoate = D-2-Aminobutyrate	C00109 + C00014 = C02261 + C00001	3	-236.099	-258.118		NA
2-Oxobutanoate = (S)-2-Aminobutanoate	C00109 + C00014 = C02356 + C00001	3	-234.643	-258.118		NA
2-Oxosuccinamate = L-Asparagine	C02362 + C00014 = C00152 + C00001	3	-208.704	-258.113		NA
omega-Aminoaldehyde = Putrescine	C02903 + C00014 = C00134 + C00001	3	-212.443	-203.664		NA
Succinic aldehyde = 4-Aminobutyraldehyde	C16835 + C00014 = C00555 + C00001	3	-224.774	-212.023		NA
Succinate semialdehyde = 4-Aminobutanoate	C00232 + C00014 = C00334 + C00001	3	-228.666	-220.386	-196.919	NA
(S)-Methylmalonate semialdehyde = L-3-Aminoisobutanoate	C06002 + C00014 = C03284 + C00001	3	-219.601	-220.411		NA
2-Methyl-3-oxopropanoate = 3-Aminoisobutyric acid	C00349 + C00014 = C05145 + C00001	3	-219.905	-220.411		NA
4-Aminobutyraldehyde = Putrescine	C00555 + C00014 = C00134 + C00001	3	-213.248	-203.664		NA
4-Methylthio-2-oxobutanoic acid = D-Methionine	C01180 + C00014 = C00855 + C00001	3	-235.747	-258.113		NA
2-Oxopentanoic acid = D-Norvaline	C06255 + C00014 = C01799 + C00001	3	-229.138	-258.118		NA
4,5-Dioxopentanoate = (S)-4-Amino-5-oxopentanoate	C02800 + C00014 = C03741 + C00001	3	-240.05	-256.358		NA
2-Oxopentanoic acid = L-Norvaline	C06255 + C00014 = C01826 + C00001	3	-229.796	-258.118		NA
2,5-Dioxopentanoate = L-Glutamate 5-semialdehyde	C00433 + C00014 = C01165 + C00001	3	-212.618	-258		NA
3-Methyl-2-oxobutanoic acid = D-Valine	C00141 + C00014 = C06417 + C00001	3	-233.378	-258.129		NA
2-Oxoglutaramate = L-Glutamine	C00940 + C00014 = C00064 + C00001	3	-233.377	-258.118	-289.127	NA
2-Oxoglutaramate = D-Glutamine	C00940 + C00014 = C00819 + C00001	3	-232.223	-258.118		NA
Phenylpyruvate = L-Phenylalanine	C00166 + C00014 = C00079 + C00001	3	-229.171	-258.104	-231.044	NA
3-(4-Hydroxyphenyl)pyruvate = L-Tyrosine	C01179 + C00014 = C00082 + C00001	3	-228.07	-258.18	-228.532	NA
N-Succinyl-2-L-amino-6-oxoheptanedioate = N-Succinyl-LL-2,6-diaminoheptanedioate	C04462 + C00014 = C04421 + C00001	3	-273.853	-274.577	-228.619	NA
D-Threonine = D-2-Aminobutyrate	C00820 = C02261 + C00001	4	-19.5151	-18.3322		NA
D-erythro-3-Hydroxyaspartate = D-Aspartate	C19838 = C00402 + C00001	4	7.95234	-18.35		NA
4-Amino-3-hydroxybutanoate = 4-Aminobutanoate	C03678 = C00334 + C00001	4	-26.0313	-18.1804		NA
Tromethamine = 2-Amino-2-methyl-1,3-propandiol	C07182 = C11260 + C00001	4	23.107	-7.24151		NA
L-Homoserine = (S)-2-Aminobutanoate	C00263 = C02356 + C00001	4	-0.650713	-7.23737		NA
2-Hydroxy-3-oxosuccinate = Oxaloacetate	C03459 = C00036 + C00001	4	21.5071	-18.16		NA
2-Methylserine = 2-Amino-2-methylpropanoate	C02115 = C03665 + C00001	4	0.375918	-7.2555		NA
4-Hydroxy-L-threonine = L-Threonine	C06056 = C00188 + C00001	4	4.53763	-7.47497		NA
Dihydroxyfumarate = 2-Hydroxyethylenedicarboxylate	C00975 = C03981 + C00001	4	-17.0545	-18.1858		NA
4-Hydroxybutanoic acid = Butanoic acid	C00989 = C00246 + C00001	4	-8.17659	-7.10491		NA
2-Ethoxyethanol = Ether	C14687 = C13240 + C00001	4	-0.337027	-7.1407		NA
4-Hydroxyacid = Butanoic acid	C01991 = C00246 + C00001	4	-8.48383	-7.10491		NA
3-Hydroxy-2-methylpropanoate = 2-Methylpropanoate	C01188 = C02632 + C00001	4	-7.04708	-7.10693		NA
Diethylene glycol = 2-Ethoxyethanol	C14689 = C14687 + C00001	4	6.03002	-7.1407		NA
2-Hydroxybutanoic acid = Butanoic acid	C05984 = C00246 + C00001	4	-3.11214	-18.1131	18.317	NA
L-Threonine = (S)-2-Aminobutanoate	C00188 = C02356 + C00001	4	-18.9182	-18.3322		NA
4-Hydroxy-L-threonine = L-Homoserine	C06056 = C00263 + C00001	4	-16.0283	-18.5698		NA
L-Allothreonine = (S)-2-Aminobutanoate	C05519 = C02356 + C00001	4	-19.8674	-18.3322		NA
D-Allothreonine = D-2-Aminobutyrate	C12317 = C02261 + C00001	4	-20.1926	-18.3322		NA
threo-3-Hydroxy-L-aspartate = L-Aspartate	C11511 = C00049 + C00001	4	20.3437	-18.35		NA
2-Hydroxymethylserine = 2-Methylserine	C03059 = C02115 + C00001	4	7.61005	-7.50751		NA
Acetone cyanohydrin = Isobutyronitrile	C02659 = C02420 + C00001	4	-3.16394	-51.2781		NA
3-Hydroxy-3-methyl-2-oxobutanoic acid = 3-Methyl-2-oxobutanoic acid	C04181 = C00141 + C00001	4	-21.3607	-51.2772		NA
(4R)-4-Hydroxy-2-oxoglutarate = 2-Oxoglutarate	C05946 = C00026 + C00001	4	-10.1928	-18.1589		NA
beta-D-Ribofuranose = Deoxyribose	C16639 = C01801 + C00001	4	0.741893	-75.4216		NA
alpha-D-Ribose 1-phosphate = 5-Deoxyribose-1-phosphate	C00620 = C16637 + C00001	4	27.5963	-7.14072		NA
(S)-2-Hydroxyglutarate = Glutarate	C03196 = C00489 + C00001	4	-1.56327	-18.1531		NA
D-Ribose = Deoxyribose	C00121 = C01801 + C00001	4	7.91391	-75.4216		NA
(R)-2-Hydroxyglutarate = Glutarate	C01087 = C00489 + C00001	4	3.0904	-18.1531		NA
beta-L-Arabinose = 2-Deoxy-L-arabinose	C02479 = C02783 + C00001	4	-2.21475	-75.4216		NA
cis-4-Hydroxy-D-proline = D-Proline	C03440 = C00763 + C00001	4	-20.0405	-75.4253		NA
3-Hydroxy-L-glutamate = L-Glutamate	C03066 = C00025 + C00001	4	21.2401	-18.485		NA
5-Hydroxymethyluracil = Thymine	C03088 = C00178 + C00001	4	4.97678	-7.14072		NA
4-Hydroxy-L-glutamate = L-Glutamate	C03079 = C00025 + C00001	4	12.2343	-18.3391		NA
L-4-Hydroxyglutamate semialdehyde = L-Glutamate 5-semialdehyde	C05938 = C01165 + C00001	4	4.24089	-18.4119		NA
4-Hydroxy-2-oxopentanoate = 2-Oxopentanoic acid	C03589 = C06255 + C00001	4	-34.8555	-18.16		NA
5-Hydroxypyrrole-2-carboxylate = Pyrrole-2-carboxylate	C19721 = C05942 + C00001	4	-24.714	-246.093		NA
trans-4-Hydroxy-D-proline = D-Proline	C03651 = C00763 + C00001	4	-2.07862	-75.4253		NA
cis-4-Hydroxy-L-proline = L-Proline	C01015 = C00148 + C00001	4	-2.60322	-75.4253		NA
alpha-D-Ribose 5-phosphate = 2-Deoxy-D-ribose 5-phosphate	C03736 = C00673 + C00001	4	58.049	-75.4107		NA
2-Oxo-4-hydroxy-5-aminovalerate = 5-Amino-2-oxopentanoic acid	C05941 = C01110 + C00001	4	-22.5179	-18.2821		NA
5-Hydroxy-2,4-dioxopentanoate = Acetylpyruvate	C05406 = C02132 + C00001	4	13.1398	-7.12506		NA
Trichloroethanol = 1,1,1-Trichloroethane	C07490 = C18246 + C00001	4	12.1562	-7.14077		NA
5-Hydroxypentanoate = Pentanoate	C02804 = C00803 + C00001	4	-7.85472	-7.09849		NA
alpha-D-Ribose 1-phosphate = 2-Deoxy-D-ribose 1-phosphate	C00620 = C00672 + C00001	4	13.1855	-75.0824		NA
2,3,6-Trihydroxypyridine = 2,6-Dihydroxypyridine	C03458 = C03056 + C00001	4	-7.91399	-245.936		NA
2-Dehydro-D-xylonate = 2-Dehydro-3-deoxy-D-xylonate	C02928 = C03826 + C00001	4	17.7612	-18.1607		NA
2,6-Dihydroxypyridine = 2-Hydroxypyridine	C03056 = C02502 + C00001	4	-68.8706	-245.848		NA
D-Xylulose 5-phosphate = 1-Deoxy-D-xylulose 5-phosphate	C00231 = C11437 + C00001	4	17.5922	-7.14308		NA
Methanol = Methane	C00132 = C01438 + C00001	4	26.582		84.6549	NA
Glycolaldehyde = Acetaldehyde	C00266 = C00084 + C00001	4	13.327	-7.1407		NA
Ethylene glycol = Ethanol	C01380 = C00469 + C00001	4	-0.375729	-7.1407		NA
Glycolate = Acetate	C00160 = C00033 + C00001	4	9.76424	-7.11982	-38.5165	NA
1-Hydroxy-2-aminoethylphosphonate = 2-Aminoethylphosphonate	C05678 = C03557 + C00001	4	25.8302	-21.0089		NA
N-(Hydroxymethyl)urea = N-Methylurea	C06384 = C16363 + C00001	4	-37.568	-7.14069		NA
Ethanolamine = Ethylamine	C00189 = C00797 + C00001	4	2.50083	-7.16927		NA
omega-Hydroxy fatty acid = Acetate	C03547 = C00033 + C00001	4	10.0348	-7.11982		NA
Glycerone = Hydroxyacetone	C00184 = C05235 + C00001	4	22.2247	-7.1407		NA
(S)-Lactaldehyde = Propanal	C00424 = C00479 + C00001	4	-13.5768	-18.1607		NA
(S)-Lactate = Propanoate	C00186 = C00163 + C00001	4	-15.6549	-18.1272		NA
D-Glycerate = 3-Hydroxypropanoate	C00258 = C01013 + C00001	4	-3.13742	-18.1519	44.4706	NA
(R)-Lactaldehyde = Propanal	C00937 = C00479 + C00001	4	-12.6232	-18.1607		NA
(R)-Propane-1,2-diol = Propan-2-ol	C02912 = C01845 + C00001	4	-4.12808	-7.1407		NA
(R)-Propane-1,2-diol = Propane-1-ol	C02912 = C05979 + C00001	4	-31.6468	-18.1607		NA
Propane-1,2-diol = Propane-1-ol	C00583 = C05979 + C00001	4	-31.6123			NA
(R)-Lactate = Propanoate	C00256 = C00163 + C00001	4	-13.5904	-18.1272		NA
L-Glyceraldehyde = 3-Hydroxypropanal	C02426 = C00969 + C00001	4	1.33054	-18.1607		NA
3-Aminopropane-1,2-diol = (R)-1-Aminopropan-2-ol	C06057 = C03194 + C00001	4	5.76627	-7.18562		NA
D-Glyceraldehyde = 3-Hydroxypropanal	C00577 = C00969 + C00001	4	0.808159	-18.1607		NA
Propane-1,2-diol = Propan-2-ol	C00583 = C01845 + C00001	4	-2.72078			NA
D-Glycerate = (R)-Lactate	C00258 = C00256 + C00001	4	6.98324	-7.13844	-8.36178	NA
Glycerone phosphate = Hydroxyacetone phosphate	C00111 = C03505 + C00001	4	12.4263	-7.05922		NA
3-Hydroxypropanoate = Propanoate	C01013 = C00163 + C00001	4	-3.59389	-7.11377		NA
3-Hydroxypropanal = Propanal	C00969 = C00479 + C00001	4	3.19147	-7.1407		NA
Allyl alcohol = Propylene	C02001 = C11505 + C00001	4	2.85619	-7.1407		NA
Propane-1,3-diol = Propane-1-ol	C02457 = C05979 + C00001	4	-2.38641	-7.1407		NA
L-Glyceraldehyde = (S)-Lactaldehyde	C02426 = C00424 + C00001	4	16.0618	-7.14073		NA
D-Serine = D-Alanine	C00740 = C00133 + C00001	4	0.586335	-7.34575		NA
Hydroxymalonate = Malonate	C02287 = C00383 + C00001	4	6.27993	-17.8964		NA
Hydroxyacetone = Acetone	C05235 = C00207 + C00001	4	18.8291	-7.1407		NA
Hydroxypyruvate = Pyruvate	C00168 = C00022 + C00001	4	28.5389	-7.14038	30.2289	NA
HMMF = N,N-Dimethylformamide	C11488 = C03134 + C00001	4	-18.2376	-7.1407		NA
D-Glyceraldehyde = (R)-Lactaldehyde	C00577 = C00937 + C00001	4	15.2599	-7.14073		NA
Glycerol = Propane-1,3-diol	C00116 = C02457 + C00001	4	-22.0164	-18.1607		NA
2-Hydroxy-3-oxopropanoate = 3-Oxopropanoate	C01146 = C00222 + C00001	4	8.34029	-18.1577	93.3354	NA
2-Chloroethanol = Chloroethane	C06753 = C18248 + C00001	4	3.11154	-7.1407		NA
L-Serine = L-Alanine	C00065 = C00041 + C00001	4	-1.14564	-7.34575	9.51734	NA
meso-Tartaric acid = (S)-Malate	C00552 = C00149 + C00001	4	7.81857	-18.1354		NA
(R)-Malate = Succinate	C00497 = C00042 + C00001	4	-1.19063	-18.0384	-72.9113	NA
meso-Tartaric acid = (R)-Malate	C00552 = C00497 + C00001	4	6.37315	-18.1354		NA
(R)-3-Hydroxybutanoate = Butanoic acid	C01089 = C00246 + C00001	4	-37.7441	-18.1237	-33.741	NA
(S)-Acetoin = Methyl ethyl ketone	C01769 = C02845 + C00001	4	-20.743	-18.1607		NA
(S)-3-Hydroxybutanoate = Butanoic acid	C03197 = C00246 + C00001	4	-35.9907	-18.1237		NA
(R)-Acetoin = Methyl ethyl ketone	C00810 = C02845 + C00001	4	-19.2924	-18.1607		NA
(S)-Malate = Succinate	C00149 = C00042 + C00001	4	-0.645469	-18.0384	-24.9726	NA
(S)-3-Hydroxyisobutyrate = 2-Methylpropanoate	C06001 = C02632 + C00001	4	-7.22688	-7.10693		NA
erythro-3-Hydroxy-Ls-aspartate = L-Aspartate	C03961 = C00049 + C00001	4	11.9649	-18.35		NA
threo-3-Hydroxy-D-aspartate = D-Aspartate	C19813 = C00402 + C00001	4	16.8399	-18.35		NA
2,6-Dihydroxynicotinate = 6-Hydroxynicotinate	C15523 = C01020 + C00001	4	-98.7157	-245.845		NA
4-Bromocatechol = 4-Bromophenol	C14843 = C14453 + C00001	4	-30.9756	-246.06		NA
2-Bromophenol = Bromobenzene	C14841 = C11036 + C00001	4	-35.5601	-247.45		NA
1,2,3,5-Tetrahydroxybenzene = Phloroglucinol	C03743 = C02183 + C00001	4	-8.94522	-245.842		NA
1,2,3,5-Tetrahydroxybenzene = 1,2,3-Trihydroxybenzene	C03743 = C01108 + C00001	4	-29.4891	-245.744		NA
alpha-D-Glucose = 2-Deoxy-D-glucose	C00267 = C00586 + C00001	4	-2.89195	-75.4217		NA
trans-1,2-Cyclohexanediol = Cyclohexanol	C03739 = C00854 + C00001	4	-32.1218	-75.4206		NA
gamma-Hydroxy-L-arginine = L-Arginine	C08284 = C00062 + C00001	4	-13.1302	-18.2898		NA
D-Galactosamine = D-Fucosamine	C02262 = C15478 + C00001	4	-31.0467	-7.1407		NA
Nojirimycin = Deoxynojirimycin	C06763 = C16843 + C00001	4	-17.6336	-81.8547		NA
2-Aminophenol = Aniline	C01987 = C00292 + C00001	4	-35.259	-245.844		NA
3-Nitrophenol = Nitrobenzene	C14418 = C06813 + C00001	4	-38.9125	-247.108		NA
4-Bromophenol = Bromobenzene	C14453 = C11036 + C00001	4	-37.1814	-246.046		NA
3-Hydroxyaminophenol = Hydroxylaminobenzene	C14602 = C02720 + C00001	4	-110.131	-245.785		NA
Aminohydroquinone = m-Aminophenol	C14604 = C05058 + C00001	4	-21.8005	-245.826		NA
2-Hydroxy-1,4-benzoquinone = p-Benzoquinone	C07103 = C00472 + C00001	4	-91.6374	428.632		NA
4-Nitrocatechol = 4-Nitrophenol	C02235 = C00870 + C00001	4	-28.552	-243.537		NA
Phenol = Benzene	C15584 = C01407 + C00001	4	-40.8407	-245.87		NA
1-Amino-1-deoxy-scyllo-inositol = 2-Deoxy-scyllo-inosamine	C01214 = C17580 + C00001	4	-9.61285	-75.8698		NA
D-Alanyl-D-serine = D-Alanyl-D-alanine	C19719 = C00993 + C00001	4	9.45436	-7.1276		NA
Cyclohexanol = Cyclohexane	C00854 = C11249 + C00001	4	-34.8987	-75.4205		NA
L-Hydroxylysine = L-Lysine	C16741 = C00047 + C00001	4	-20.9582	-18.2227		NA
4-Nitrophenol = Nitrobenzene	C00870 = C06813 + C00001	4	-60.5401	-258.85		NA
4-Aminocatechol = m-Aminophenol	C18351 = C05058 + C00001	4	-23.0636	-245.953		NA
4-Aminocatechol = 4-Hydroxyaniline	C18351 = C02372 + C00001	4	-35.2863	-245.653		NA
D-Galactonate = D-Fuconate	C00880 = C01680 + C00001	4	-8.2169	-7.1401		NA
2-Dehydro-D-galactonate = 2-Dehydro-3-deoxy-D-galactonate	C03342 = C01216 + C00001	4	-8.32682	-18.1614		NA
6-Hydroxyhexan-6-olide = epsilon-Caprolactone	C03241 = C01880 + C00001	4	-18.537	-75.4207		NA
3-Hydroxycyclohexanone = Cyclohexanone	C03228 = C00414 + C00001	4	-26.1168	-75.4205		NA
2-Hydroxy-3-oxoadipate = 3-Oxoadipate	C03217 = C00846 + C00001	4	-2.62485	-18.1579		NA
D-Galactono-1,4-lactone = D-Fucono-1,4-lactone	C03383 = C06158 + C00001	4	8.8216	-7.14071		NA
cis-1,2-Cyclohexanediol = Cyclohexanol	C12313 = C00854 + C00001	4	-25.3356	-75.4206		NA
1,2,3,5-Tetrahydroxybenzene = Benzene-1,2,4-triol	C03743 = C02814 + C00001	4	-30.8739	-245.924		NA
4-Hydroxy-2-oxohexanoic acid = 2-Oxohexanoic acid	C06762 = C00902 + C00001	4	-26.5102	-18.1597		NA
m-Aminophenol = Aniline	C05058 = C00292 + C00001	4	-45.4661	-245.841		NA
4-Sulfocatechol = p-Phenolsulfonic acid	C06674 = C12849 + C00001	4	-31.511	-246.039		NA
2-Keto-D-gluconic acid = 2-Dehydro-3-deoxy-D-gluconate	C06473 = C00204 + C00001	4	3.70134	-18.1614	-70.3291	NA
Streptamine 4-phosphate = 2-Deoxystreptamine 4-phosphate	C03433 = C03980 + C00001	4	-3.83641	-78.3591		NA
Benzene-1,2,4-triol = Catechol	C02814 = C00090 + C00001	4	-29.5958	-245.834		NA
6-Hydroxyhexanoic acid = Hexanoic acid	C06103 = C01585 + C00001	4	-9.14266	-7.093		NA
Benzene-1,2,4-triol = Catechol	C02814 = C15571 + C00001	4	-29.2766	-245.834		NA
5-Hydroxymethyl-2-furaldehyde = 5-Methyl-2-furaldehyde	C11101 = C11115 + C00001	4	19.5359	-7.1407		NA
2-Hydroxyadipate = Adipate	C02360 = C06104 + C00001	4	-0.301264	-18.1502		NA
1-Oxa-2-oxo-3-hydroxycycloheptane = epsilon-Caprolactone	C12314 = C01880 + C00001	4	-10.186	-75.4206		NA
4-Hydroxyaniline = Aniline	C02372 = C00292 + C00001	4	-33.3493	-246.141		NA
Benzene-1,2,4-triol = Hydroquinone	C02814 = C00530 + C00001	4	-33.2966	-245.895		NA
3-Hydroxybenzaldehyde = Benzaldehyde	C03067 = C00261 + C00001	4	-40.2358	-246.127		NA
Guaiacol = Anisole	C15572 = C01403 + C00001	4	-36.0123	-245.872		NA
3,4-Dihydroxybenzaldehyde = 4-Hydroxybenzaldehyde	C16700 = C00633 + C00001	4	-32.1194	-244.028		NA
p-Hydroxybenzyl alcohol = Benzyl alcohol	C17467 = C00556 + C00001	4	-40.4375	-245.928		NA
4-Cresol = Toluene	C01468 = C01455 + C00001	4	-37.1929	-245.857		NA
3-Cresol = Toluene	C01467 = C01455 + C00001	4	-41.6415	-245.865		NA
4-Sulfobenzyl alcohol = Toluene-4-sulfonate	C06678 = C06677 + C00001	4	8.13485	-7.1407		NA
L-Carnitine = 4-Trimethylammoniobutanoate	C00318 = C01181 + C00001	4	-3.60616	-18.1441		NA
4-Hydroxymethylcatechol = p-Hydroxybenzyl alcohol	C14110 = C17467 + C00001	4	-31.6555	-245.913		NA
4-Hydroxymethylcatechol = 4-Methylcatechol	C14110 = C06730 + C00001	4	4.6369	-7.21919		NA
4-Hydroxy-2-oxo-heptanedioate = 2-Oxopimelate	C05601 = C16588 + C00001	4	-12.3921	-18.1591		NA
4-Methylcatechol = 4-Cresol	C06730 = C01468 + C00001	4	-32.4689	-245.905		NA
Sedoheptulose 7-phosphate = 1-Deoxy-D-altro-heptulose 7-phosphate	C05382 = C04359 + C00001	4	20.1849	-7.40131		NA
(+)-gamma-Hydroxy-L-homoarginine = Homoarginine	C08286 = C01924 + C00001	4	-12.1536	-18.2213		NA
4-Aminosalicylate = 4-Aminobenzoate	C02518 = C00568 + C00001	4	-77.3769	-245.811		NA
4-Methylcatechol = 3-Cresol	C06730 = C01467 + C00001	4	-28.0702	-245.898		NA
4-Hydroxymethylcatechol = 3-Hydroxybenzyl alcohol	C14110 = C03351 + C00001	4	-30.5958	-245.892		NA
Salicyl alcohol = Benzyl alcohol	C02323 = C00556 + C00001	4	-56.2079	-245.876		NA
Gentisate aldehyde = 3-Hydroxybenzaldehyde	C05585 = C03067 + C00001	4	-53.8361	-245.988		NA
4-Hydroxybenzoate = Benzoate	C00156 = C00180 + C00001	4	-48.2709	-245.956		NA
2,5-Dihydroxybenzoate = 3-Hydroxybenzoate	C00628 = C00587 + C00001	4	-62.5458	-245.754		NA
Orcinol = 3-Cresol	C00727 = C01467 + C00001	4	-43.1176	-245.929		NA
3,4-Dihydroxybenzoate = 4-Hydroxybenzoate	C00230 = C00156 + C00001	4	-32.7751	-245.927		NA
2,3-Dihydroxybenzoate = Salicylate	C00196 = C00805 + C00001	4	-33.4089	-245.955		NA
5-Chloro-1,2,4-trihydroxybenzene = Chlorohydroquinone	C07102 = C06601 + C00001	4	-31.8559	-245.917		NA
3-Hydroxybenzyl alcohol = Benzyl alcohol	C03351 = C00556 + C00001	4	-42.2859	-245.949		NA
3,4-Dihydroxybenzaldehyde = 3-Hydroxybenzaldehyde	C16700 = C03067 + C00001	4	-49.7473	-252.125		NA
Gentisyl alcohol = Salicyl alcohol	C10792 = C02323 + C00001	4	-28.4396	-245.864		NA
2,5-Dihydroxybenzoate = Salicylate	C00628 = C00805 + C00001	4	-28.7369	-245.892		NA
p-Hydroxybenzyl alcohol = 4-Cresol	C17467 = C01468 + C00001	4	3.95879	-7.2114		NA
2,4,5-Trihydroxytoluene = 4-Methylcatechol	C18317 = C06730 + C00001	4	-28.627	-245.825		NA
Chlorohydroquinone = 2-Chlorophenol	C06601 = C14219 + C00001	4	-24.9715	-244.411		NA
Chlorohydroquinone = 3-Chlorophenol	C06601 = C14270 + C00001	4	-20.703	-246.421		NA
Benzyl alcohol = Toluene	C00556 = C01455 + C00001	4	7.05098	-7.1407		NA
3-Hydroxyanthranilate = Anthranilate	C00632 = C00108 + C00001	4	-36.1552	-245.859		NA
1,7-Dimethyluric acid = 1,7-Dimethylxanthine	C16356 = C13747 + C00001	4	-120.266	-245.847		NA
4-Hydroxybenzaldehyde = Benzaldehyde	C00633 = C00261 + C00001	4	-58.5326	-254.223		NA
DNOC = 3,5-Dinitrotoluene	C18653 = C19410 + C00001	4	-91.3621	461.157		NA
Salicylaldehyde = Benzaldehyde	C06202 = C00261 + C00001	4	-69.5002	-246.793		NA
Anthopleurine = L-Carnitine	C16994 = C00318 + C00001	4	17.9402	-18.1451		NA
Gallate = 3,4-Dihydroxybenzoate	C01424 = C00230 + C00001	4	-31.4495	-246.081		NA
2,3-Dihydroxytoluene = o-Cresol	C02923 = C01542 + C00001	4	-31.6404	-245.899		NA
3-Chlorocatechol = 3-Chlorophenol	C05618 = C14270 + C00001	4	-25.704	-247.2		NA
o-Cresol = Toluene	C01542 = C01455 + C00001	4	-41.0806	-245.857		NA
3-Propylmalate = 2-Propylsuccinic acid	C02123 = C16657 + C00001	4	4.0773	-18.0423		NA
4-Chlorophenol = Chlorobenzene	C02124 = C06990 + C00001	4	-36.8023	-246.114		NA
5-Chloro-1,2,4-trihydroxybenzene = 4-Chlorocatechol	C07102 = C02375 + C00001	4	-23.2884	-246.368		NA
Gentisate aldehyde = Salicylaldehyde	C05585 = C06202 + C00001	4	-24.7185	-245.322		NA
2,3,5-Trihydroxytoluene = Orcinol	C03338 = C00727 + C00001	4	-18.5938	-245.813		NA
o-Methoxyphenol = Anisole	C01502 = C01403 + C00001	4	-35.9659	-245.872		NA
4-Chlorocatechol = 4-Chlorophenol	C02375 = C02124 + C00001	4	-31.5144	-246.096		NA
2-Chlorophenol = Chlorobenzene	C14219 = C06990 + C00001	4	-34.4133	-248.251		NA
3-Chlorophenol = Chlorobenzene	C14270 = C06990 + C00001	4	-39.5227	-246.241		NA
2,3-Dihydroxytoluene = 3-Cresol	C02923 = C01467 + C00001	4	-30.6804	-245.892		NA
2-Methoxy-5-nitrophenol = 4-Nitroanisole	C17385 = C07555 + C00001	4	-33.7121	-246.319		NA
trans-4-Hydroxycyclohexanecarboxylate = Cyclohexane-1-carboxylate	C04404 = C09822 + C00001	4	-34.8933	-75.3981		NA
Salicyl alcohol = o-Cresol	C02323 = C01542 + C00001	4	-9.09801	-7.15981		NA
Salicylate = Benzoate	C00805 = C00180 + C00001	4	-75.336	-245.839		NA
3-Chlorocatechol = 2-Chlorophenol	C05618 = C14219 + C00001	4	-30.0884	-245.19		NA
6-Chlorobenzene-1,2,4-triol = Chlorohydroquinone	C06328 = C06601 + C00001	4	-31.4584	-245.745		NA
6-Chlorobenzene-1,2,4-triol = 3-Chlorocatechol	C06328 = C05618 + C00001	4	-26.2601	-244.966		NA
6-Chlorobenzene-1,2,4-triol = 4-Chlorocatechol	C06328 = C02375 + C00001	4	-23.0945	-246.197		NA
3,5-Dihydroxyanthranilate = 3-Hydroxyanthranilate	C11465 = C00632 + C00001	4	-32.2293	-246.068		NA
3,4-Dihydroxybenzoate = 3-Hydroxybenzoate	C00230 = C00587 + C00001	4	-39.5907	-245.906		NA
3-Hydroxybenzoate = Benzoate	C00587 = C00180 + C00001	4	-41.6076	-245.976		NA
2,3,5-Trihydroxytoluene = 2,3-Dihydroxytoluene	C03338 = C02923 + C00001	4	-31.48	-245.85		NA
(S)-Carnitine = 4-Trimethylammoniobutanoate	C15025 = C01181 + C00001	4	-4.10486	-18.1441		NA
Ribose triphosphate = Deoxyribose triphosphate	C02884 = C12347 + C00001	4	0.91864	-75.4332		NA
L-1-Pyrroline-3-hydroxy-5-carboxylate = (S)-1-Pyrroline-5-carboxylate	C04281 = C03912 + C00001	4	6.58887	-74.6624		NA
cis-3-Hydroxy-L-proline = L-Proline	C19706 = C00148 + C00001	4	-15.1894	-75.4253		NA
D-Ribose 1,5-bisphosphate = 2-Deoxy-D-ribose 1,5-bisphosphate	C01151 = C04175 + C00001	4	1.35789	-75.3286		NA
trans-3-Hydroxy-L-proline = L-Proline	C05147 = C00148 + C00001	4	-2.96862	-75.4253		NA
4-Hydroxy-2-oxoglutarate = 2-Oxoglutarate	C01127 = C00026 + C00001	4	-9.05179	-18.1589	-33.1616	NA
Isocitrate = Propane-1,2,3-tricarboxylate	C00311 = C19806 + C00001	4	9.40912	-18.1385		NA
5-Dehydro-D-gluconate = 2-Dehydro-3-deoxy-D-gluconate	C01062 = C00204 + C00001	4	-42.7251	-18.1919		NA
6-Deoxy-L-galactose = 3,6-Dideoxy-L-galactose	C01019 = C03348 + C00001	4	-37.7095	-75.4209		NA
4-Fluorocatechol = 4-Fluorophenol	C16473 = C16485 + C00001	4	-32.0883	-246.383		NA
4-Fluorophenol = Fluorobenzene	C16485 = C11272 + C00001	4	-31.3701	-245.988		NA
5-Dehydro-D-gluconate = 2-Deoxy-5-keto-D-gluconic acid	C01062 = C06892 + C00001	4	-9.66928	-18.1877		NA
2-Amino-5-nitrophenol = 4-Nitroaniline	C19322 = C02126 + C00001	4	-22.0658	-246.08		NA
Citrate = Propane-1,2,3-tricarboxylate	C00158 = C19806 + C00001	4	-7.30433	-51.2538		NA
beta-D-Galactose = 2-Deoxy-D-galactose	C00962 = C02781 + C00001	4	-28.6349	-75.4217		NA
5-Hydroxyectoine = Ectoine	C16432 = C06231 + C00001	4	2.26351	-75.5507		NA
Phenol = Benzene	C00146 = C01407 + C00001	4	-40.8606	-245.87		NA
Hydroquinone = Phenol	C00530 = C00146 + C00001	4	-27.7331	-245.875		NA
beta-D-Glucose = 6-Deoxy-D-glucose	C00221 = C02522 + C00001	4	-13.4061	-7.1407		NA
beta-D-Galactose = 6-Deoxy-D-galactose	C00962 = C01018 + C00001	4	-29.9015	-7.1407		NA
beta-D-Glucose = 2-Deoxy-D-glucose	C00221 = C00586 + C00001	4	-20.4702	-75.4217		NA
1,2,3-Trihydroxybenzene = Catechol	C01108 = C00090 + C00001	4	-31.4605	-246.015		NA
3-Hydroxy-5-oxohexanoate = 5-Oxohexanoic acid	C16272 = C02129 + C00001	4	-27.9342	-18.1507		NA
3-Hydroxypicolinic acid = Picolinic acid	C18620 = C10164 + C00001	4	-73.316	-246.231		NA
beta-D-Fucose = Abequose	C02095 = C06471 + C00001	4	-35.5401	-75.4209		NA
beta-Hydroxyarginine = L-Arginine	C18473 = C00062 + C00001	4	-8.22385	-18.3819		NA
alpha-D-Galactose = 6-Deoxy-D-galactose	C00984 = C01018 + C00001	4	6.0302	-7.1407		NA
D-Glucose = 2-Deoxy-D-glucose	C00031 = C00586 + C00001	4	-5.78511	-75.4217		NA
beta-D-Glucose 6-phosphate = 2-Deoxy-D-glucose 6-phosphate	C01172 = C06369 + C00001	4	9.75554	-75.4245		NA
alpha-D-Glucose = 6-Deoxy-D-glucose	C00267 = C02522 + C00001	4	4.26903	-7.1407		NA
alpha-D-Galactose = 2-Deoxy-D-galactose	C00984 = C02781 + C00001	4	8.77279	-75.4217		NA
1,2,3-Trihydroxybenzene = Resorcinol	C01108 = C01751 + C00001	4	-20.0728	-245.992		NA
2-Hydroxycyclohexan-1-one = Cyclohexanone	C01147 = C00414 + C00001	4	-24.6292	-75.4206		NA
2-Amino-4-nitrophenol = 4-Nitroaniline	C19321 = C02126 + C00001	4	-23.9014	-249.126		NA
alpha-D-Glucose 6-phosphate = 2-Deoxy-D-glucose 6-phosphate	C00668 = C06369 + C00001	4	24.8171	-75.4245		NA
D-Galactose 6-phosphate = 2-Deoxy-D-glucose 6-phosphate	C01113 = C06369 + C00001	4	28.9192	-75.4245		NA
allo-Hydroxy-L-lysine = L-Lysine	C16742 = C00047 + C00001	4	-20.3558	-18.2227		NA
Catechol = Phenol	C00090 = C00146 + C00001	4	-31.4842	-245.935		NA
4-Nitrocatechol = 3-Nitrophenol	C02235 = C14418 + C00001	4	-50.1323	-255.279		NA
Phloroglucinol = Resorcinol	C02183 = C01751 + C00001	4	-41.4958	-245.893		NA
2-Nitrophenol = Nitrobenzene	C01988 = C06813 + C00001	4	-58.6559	459.493		NA
2-Dehydro-3-deoxy-D-galactonate = 2-Dehydro-3-deoxy-D-fuconate	C01216 = C06159 + C00001	4	3.84721	-7.14049		NA
6-Phospho-2-dehydro-D-gluconate = 2-Dehydro-3-deoxy-6-phospho-D-gluconate	C01218 = C04442 + C00001	4	19.0666	-18.1457		NA
D-Glucuronic acid = 5-Deoxy-D-glucuronate	C16245 = C16737 + C00001	4	7.50566	-18.1575		NA
L-Galactonate = L-Fuconate	C15930 = C01720 + C00001	4	-6.30327	-7.1401		NA
L-Galactose = 6-Deoxy-L-galactose	C01825 = C01019 + C00001	4	5.95511	-7.1407		NA
Streptamine = 2-Deoxystreptamine	C01854 = C02627 + C00001	4	4.35734	-78.1359		NA
L-Tyrosine = L-Phenylalanine	C00082 = C00079 + C00001	4	-47.1722	-245.918	-32.9797	NA
3-(4-Hydroxyphenyl)pyruvate = Phenylpyruvate	C01179 = C00166 + C00001	4	-45.6286	-245.995	-30.4684	NA
