# Supplementary material for: Quantum chemistry reveals thermodynamic principles of redox biochemistry
Source: PLoS Comput Biol. 2018 Oct 24;14(10):e1006471. doi: 10.1371/journal.pcbi.1006471 (PMC6218094; doi:10.1371/journal.pcbi.1006471)
Supplement: S3 Dataset — (XLSX) [file pcbi.1006471.s015.xlsx]

## Sheet: Dataset_S3
KEGG_ID	compound_name	smiles_major_species_pH0	charge
C00001	H20	O	0
C00022	Pyruvate	CC(=O)C(O)=O	0		Column	Description
C00025	L-Glutamate	[NH3+][C@@H](CCC(O)=O)C(O)=O	1		KEGG_ID	compound KEGG ID
C00026	2-Oxoglutarate	OC(=O)CCC(=O)C(O)=O	0		compound_name	compound name as per the KEGG database
C00033	Acetate	CC(O)=O	0		smiles_major_species_pH0	SMILES string representation for most abundant species (protonation state) at pH = 0 obtained with chemaxon cxcalc (see Methods)
C00037	Glycine	[NH3+]CC(O)=O	1		charge	charge of the most abundant species (protonation state) at pH = 0 obtained with chemaxon cxcalc (see Methods)
C00042	Succinate	OC(=O)CCC(O)=O	0
C00048	Glyoxylate	OC(=O)C=O	0
C00049	L-Aspartate	[NH3+][C@@H](CC(O)=O)C(O)=O	1
C00058	Formate	OC=O	0
C00067	Formaldehyde	C=O	0
C00084	Acetaldehyde	CC=O	0
C00099	beta-Alanine	[NH3+]CCC(O)=O	1
C00118	D-Glyceraldehyde 3-phosphate	O[C@H](COP(O)(O)=O)C=O	0
C00160	Glycolate	OCC(O)=O	0
C00163	Propanoate	CCC(O)=O	0
C00186	(S)-Lactate	C[C@H](O)C(O)=O	0
C00197	3-Phospho-D-glycerate	O[C@H](COP(O)(O)=O)C(O)=O	0
C00209	Oxalate	OC(=O)C(O)=O	0
C00222	3-Oxopropanoate	OC(=O)CC=O	0
C00232	Succinate semialdehyde	OC(=O)CCC=O	0
C00246	Butanoic acid	CCCC(O)=O	0
C00256	(R)-Lactate	C[C@@H](O)C(O)=O	0
C00258	D-Glycerate	OC[C@@H](O)C(O)=O	0
C00266	Glycolaldehyde	OCC=O	0
C00282	MISSING	[H][H]	0
C00334	4-Aminobutanoate	[NH3+]CCCC(O)=O	1
C00349	2-Methyl-3-oxopropanoate	CC(C=O)C(O)=O	0
C00383	Malonate	OC(=O)CC(O)=O	0
C00424	(S)-Lactaldehyde	C[C@H](O)C=O	0
C00431	5-Aminopentanoate	[NH3+]CCCCC(O)=O	1
C00433	2,5-Dioxopentanoate	OC(=O)C(=O)CCC=O	0
C00441	L-Aspartate 4-semialdehyde	[NH3+][C@@H](CC=O)C(O)=O	1
C00479	Propanal	CCC=O	0
C00511	Acrylic acid	OC(=O)C=C	0
C00545	L-Arabinonate	OC[C@H](O)[C@H](O)[C@@H](O)C(O)=O	0
C00546	Methylglyoxal	CC(=O)C=O	0
C00555	4-Aminobutyraldehyde	[NH3+]CCCC=O	1
C00576	Betaine aldehyde	C[N+](C)(C)CC=O	1
C00577	D-Glyceraldehyde	OC[C@@H](O)C=O	0
C00593	Sulfoacetaldehyde	[O-]S(=O)(=O)CC=O	-1
C00597	Glycerate 3-phosphate	OC(COP(O)(O)=O)C(O)=O	0
C00661	Glyceraldehyde 3-phosphate	OC(COP(O)(O)=O)C=O	0
C00719	Betaine	C[N+](C)(C)CC(O)=O	1
C00804	Propynoate	OC(=O)C#C	0
C00872	Aminomalonate	[NH3+]C(C(O)=O)C(O)=O	1
C00937	(R)-Lactaldehyde	C[C@@H](O)C=O	0
C00969	3-Hydroxypropanal	OCCC=O	0
C01013	3-Hydroxypropanoate	OCCC(O)=O	0
C01073	N-Acetyl-beta-alanine	CC(=O)NCCC(O)=O	0
C01146	2-Hydroxy-3-oxopropanoate	OC(C=O)C(O)=O	0
C01165	L-Glutamate 5-semialdehyde	[NH3+][C@@H](CCC=O)C(O)=O	1
C01412	Butanal	CCCC=O	0
C01471	Acrolein	C=CC=O	0
C02170	Methylmalonate	CC(C(O)=O)C(O)=O	0
C02223	2-Methylbutanal	CCC(C)C=O	0
C02287	Hydroxymalonate	OC(C(O)=O)C(O)=O	0
C02800	4,5-Dioxopentanoate	OC(=O)CCC(=O)C=O	0
C02835	Imidazole-4-acetate	OC(=O)Cc1c[nH]c[nH+]1	1
C03079	4-Hydroxy-L-glutamate	[NH3+][C@@H](CC(O)C(O)=O)C(O)=O	1
C03167	Phosphonoacetaldehyde	OP(O)(=O)CC=O	0
C03232	3-Phosphonooxypyruvate	OC(=O)C(=O)COP(O)([O-])=O	-1
C03273	5-Oxopentanoate	OC(=O)CCCC=O	0
C03741	(S)-4-Amino-5-oxopentanoate	[NH3+][C@@H](CCC(O)=O)C=O	1
C05130	Imidazole-4-acetaldehyde	O=CCc1c[nH]c[nH+]1	1
C05665	3-Aminopropanal	[NH3+]CCC=O	1
C05682	Phosphonoacetate	OC(=O)CP(O)(O)=O	0
C05938	L-4-Hydroxyglutamate semialdehyde	[NH3+][C@@H](C[C@@H](O)C=O)C(O)=O	1
C05947	L-erythro-4-Hydroxyglutamate	[NH3+][C@@H](C[C@@H](O)C(O)=O)C(O)=O	1
C05985	2-Propynal	O=CC#C	0
C06002	(S)-Methylmalonate semialdehyde	C[C@@H](C=O)C(O)=O	0
C06108	Fluoroacetate	OC(=O)CF	0
C06144	3-Butynoate	OC(=O)CC#C	0
C06145	3-Butyn-1-al	O=CCC#C	0
C06613	trans-3-Chloroallyl aldehyde	Cl\C=C\C=O	0
C06614	trans-3-Chloroacrylic acid	OC(=O)\C=C\Cl	0
C06615	cis-3-Chloroacrylic acid	OC(=O)\C=C/Cl	0
C06735	Aminoacetaldehyde	[NH3+]CC=O	1
C06754	Chloroacetaldehyde	ClCC=O	0
C06755	Chloroacetic acid	OC(=O)CCl	0
C07329	3-Methylbutanal	CC(C)CC=O	0
C08262	3-Methylbutanoic acid	CC(C)CC(O)=O	0
C11149	Dichloroacetate	OC(=O)C(Cl)Cl	0
C11476	L-Arabinose	OC[C@H](O)[C@H](O)[C@@H](O)C=O	0
C11822	2-Aminomalonate semialdehyde	[NH3+][C@@H](C=O)C(O)=O	1
C12455	5-Aminopentanal	[NH3+]CCCCC=O	1
C12518	Glutaral	O=CCCCC=O	0
C14179	Sulfoacetate	OC(=O)CS([O-])(=O)=O	-1
C14448	Glyoxal	O=CC=O	0
C14858	2,2-Dichloroacetaldehyde	ClC(Cl)C=O	0
C15488	Fluoroacetaldehyde	FCC=O	0
C16348	cis-3-Chloroallyl aldehyde	Cl\C=C/C=O	0
C16835	Succinic aldehyde	O=CCCC=O	0
C16849	Hydroxypyruvaldehyde phosphate	OP(O)(=O)OCC(=O)C=O	0
C18170	3-Acetamidopropanal	CC(=O)NCCC=O	0
C18319	2-Methylbutyrate	CCC(C)C(O)=O	0
C00001	H20	O	0
C00033	Acetate	CC(O)=O	0
C00048	Glyoxylate	OC(=O)C=O	0
C00049	L-Aspartate	[NH3+][C@@H](CC(O)=O)C(O)=O	1
C00058	Formate	OC=O	0
C00067	Formaldehyde	C=O	0
C00084	Acetaldehyde	CC=O	0
C00092	D-Glucose 6-phosphate	OC1O[C@H](COP(O)(O)=O)[C@@H](O)[C@H](O)[C@H]1O	0
C00118	D-Glyceraldehyde 3-phosphate	O[C@H](COP(O)(O)=O)C=O	0
C00135	L-Histidine	[NH3+][C@@H](Cc1c[nH]c[nH+]1)C(O)=O	2
C00156	4-Hydroxybenzoate	OC(=O)c1ccc(O)cc1	0
C00180	Benzoate	OC(=O)c1ccccc1	0
C00197	3-Phospho-D-glycerate	O[C@H](COP(O)(O)=O)C(O)=O	0
C00209	Oxalate	OC(=O)C(O)=O	0
C00230	3,4-Dihydroxybenzoate	OC(=O)c1ccc(O)c(O)c1	0
C00246	Butanoic acid	CCCC(O)=O	0
C00253	Nicotinate	OC(=O)c1ccc[nH+]c1	1
C00258	D-Glycerate	OC[C@@H](O)C(O)=O	0
C00261	Benzaldehyde	O=Cc1ccccc1	0
C00282	MISSING	[H][H]	0
C00333	D-Galacturonate	OC1O[C@@H]([C@H](O)[C@H](O)[C@H]1O)C(O)=O	0
C00345	6-Phospho-D-gluconate	O[C@H](COP(O)(O)=O)[C@@H](O)[C@H](O)[C@@H](O)C(O)=O	0
C00441	L-Aspartate 4-semialdehyde	[NH3+][C@@H](CC=O)C(O)=O	1
C00489	Glutarate	OC(=O)CCCC(O)=O	0
C00577	D-Glyceraldehyde	OC[C@@H](O)C=O	0
C00587	3-Hydroxybenzoate	OC(=O)c1cccc(O)c1	0
C00624	N-Acetyl-L-glutamate	CC(=O)N[C@@H](CCC(O)=O)C(O)=O	0
C00628	2,5-Dihydroxybenzoate	OC(=O)c1cc(O)ccc1O	0
C00633	4-Hydroxybenzaldehyde	Oc1ccc(C=O)cc1	0
C00679	5-Dehydro-4-deoxy-D-glucarate	O[C@@H](CC(=O)C(O)=O)[C@@H](O)C(O)=O	0
C00682	2-Hydroxymuconate semialdehyde	OC(=O)C(\O)=C/C=C\C=O	0
C00805	Salicylate	OC(=O)c1ccccc1O	0
C00818	D-Glucarate	O[C@@H]([C@H](O)[C@@H](O)C(O)=O)[C@H](O)C(O)=O	0
C00880	D-Galactonate	OC[C@@H](O)[C@H](O)[C@H](O)[C@@H](O)C(O)=O	0
C00956	L-2-Aminoadipate	[NH3+][C@@H](CCCC(O)=O)C(O)=O	1
C01035	4-Guanidinobutanoate	NC(=[NH2+])NCCCC(O)=O	1
C01053	(R)-4-Dehydropantoate	CC(C)(C=O)[C@@H](O)C(O)=O	0
C01088	(R)-3,3-Dimethylmalate	CC(C)([C@@H](O)C(O)=O)C(O)=O	0
C01149	4-Trimethylammoniobutanal	C[N+](C)(C)CCCC=O	1
C01181	4-Trimethylammoniobutanoate	C[N+](C)(C)CCCC(O)=O	1
C01250	N-Acetyl-L-glutamate 5-semialdehyde	CC(=O)N[C@@H](CCC=O)C(O)=O	0
C01412	Butanal	CCCC=O	0
C01546	2-Furoate	OC(=O)c1ccco1	0
C01582	Galactose	OC[C@@H](O)[C@H](O)[C@H](O)[C@@H](O)C=O	0
C01929	L-Histidinal	[NH3+][C@@H](Cc1c[nH]c[nH+]1)C=O	2
C02220	2-Aminomuconate	[NH3+]\C(=C\C=C/C(O)=O)C([O-])=O	0
C02236	4-Sulfobenzoate	OC(=O)c1ccc(cc1)S([O-])(=O)=O	-1
C02501	2-Hydroxymuconate	OC(=O)\C=C/C=C(/O)C(O)=O	0
C02647	4-Guanidinobutanal	NC(=[NH2+])NCCCC=O	1
C02656	Pimelate	OC(=O)CCCCCC(O)=O	0
C02946	4-Acetamidobutanoate	CC(=O)NCCCC(O)=O	0
C03030	Uracil 5-carboxylate	OC(=O)C1=CNC(=O)NC1=O	0
C03067	3-Hydroxybenzaldehyde	Oc1cccc(C=O)c1	0
C03269	D-galacto-Hexodialdose	OC1O[C@H](C=O)[C@H](O)[C@H](O)[C@H]1O	0
C03273	5-Oxopentanoate	OC(=O)CCCC=O	0
C03824	2-Aminomuconate semialdehyde	[NH3+]\C(=C\C=C/C=O)C([O-])=O	0
C04053	5-Dehydro-4-deoxy-D-glucuronate	O[C@@H](CC(=O)C(O)=O)[C@@H](O)C=O	0
C04076	L-2-Aminoadipate 6-semialdehyde	[NH3+][C@@H](CCCC=O)C(O)=O	1
C04324	(1E,3E)-4-Hydroxybuta-1,3-diene-1,2,4-tricarboxylate	OC(=O)\C=C(/C=C(/O)C(O)=O)\C(O)=O	0
C04484	4-Carboxy-2-hydroxymuconate semialdehyde	OC(=O)C(\O)=C/C(=C\C=O)/C(O)=O	0
C05585	Gentisate aldehyde	Oc1ccc(O)c(C=O)c1	0
C05827	Methylimidazole acetaldehyde	Cn1c[nH+]c(CC=O)c1	1
C05828	Methylimidazoleacetic acid	Cn1c[nH+]c(CC(O)=O)c1	1
C05936	N4-Acetylaminobutanal	CC(=O)NCCCC=O	0
C06102	Adipate semialdehyde	OC(=O)CCCCC=O	0
C06104	Adipate	OC(=O)CCCCC(O)=O	0
C06202	Salicylaldehyde	Oc1ccccc1C=O	0
C06679	4-Sulfobenzaldehyde	[O-]S(=O)(=O)c1ccc(C=O)cc1	-1
C06760	2-Hydroxy-5-methyl-cis,cis-muconic semialdehyde	C\C(C=O)=C\C=C(\O)C(O)=O	0
C07327	3-Pyridinaldehyde	O=Cc1ccc[nH+]c1	1
C07478	2-Hydroxy-5-methyl-cis,cis-muconate	C\C(=C\C=C(\O)C(O)=O)C(O)=O	0
C10974	4-Methylaminobutanal	C[NH2+]CCCC=O	1
C11150	Trichloroacetate	OC(=O)C(Cl)(Cl)Cl	0
C14279	Furfural	O=Cc1ccco1	0
C14390	Heptanal	CCCCCCC=O	0
C14866	Chloral	ClC(Cl)(Cl)C=O	0
C15673	2-Dehydro-L-idonate	OC[C@H](O)[C@@H](O)[C@H](O)C(=O)C(O)=O	0
C15987	4-Methylaminobutyrate	C[NH2+]CCCC(O)=O	1
C16245	D-Glucuronic acid	O[C@@H](C=O)[C@@H](O)[C@H](O)[C@H](O)C(O)=O	0
C16590	7-Oxoheptanoic acid	OC(=O)CCCCCC=O	0
C16700	3,4-Dihydroxybenzaldehyde	Oc1ccc(C=O)cc1O	0
C17206	Uracil 5-carbaldehyde	O=CC1=CNC(=O)NC1=O	0
C17714	Heptanoic acid	CCCCCCC(O)=O	0
C19679	L-Sorbosone	OC[C@H](O)[C@@H](O)[C@H](O)C(=O)C=O	0
C00022	Pyruvate	CC(=O)C(O)=O	0
C00048	Glyoxylate	OC(=O)C=O	0
C00065	L-Serine	[NH3+][C@@H](CO)C(O)=O	1
C00067	Formaldehyde	C=O	0
C00084	Acetaldehyde	CC=O	0
C00111	Glycerone phosphate	OCC(=O)COP(O)(O)=O	0
C00116	Glycerol	OCC(O)CO	0
C00118	D-Glyceraldehyde 3-phosphate	O[C@H](COP(O)(O)=O)C=O	0
C00132	Methanol	CO	0
C00160	Glycolate	OCC(O)=O	0
C00168	Hydroxypyruvate	OCC(=O)C(O)=O	0
C00184	Glycerone	OCC(=O)CO	0
C00186	(S)-Lactate	C[C@H](O)C(O)=O	0
C00189	Ethanolamine	[NH3+]CCO	1
C00197	3-Phospho-D-glycerate	O[C@H](COP(O)(O)=O)C(O)=O	0
C00207	Acetone	CC(C)=O	0
C00222	3-Oxopropanoate	OC(=O)CC=O	0
C00256	(R)-Lactate	C[C@@H](O)C(O)=O	0
C00258	D-Glycerate	OC[C@@H](O)C(O)=O	0
C00266	Glycolaldehyde	OCC=O	0
C00282	MISSING	[H][H]	0
C00424	(S)-Lactaldehyde	C[C@H](O)C=O	0
C00469	Ethanol	CCO	0
C00479	Propanal	CCC=O	0
C00546	Methylglyoxal	CC(=O)C=O	0
C00577	D-Glyceraldehyde	OC[C@@H](O)C=O	0
C00593	Sulfoacetaldehyde	[O-]S(=O)(=O)CC=O	-1
C00603	(-)-Ureidoglycolate	NC(=O)N[C@@H](O)C(O)=O	0
C00623	sn-Glycerol 1-phosphate	OC[C@H]([OH2+])COP(O)([O-])=O	0
C00741	Diacetyl	CC(=O)C(C)=O	0
C00802	Oxalureate	NC(=O)NC(=O)C(O)=O	0
C00810	(R)-Acetoin	C[C@@H](O)C(C)=O	0
C00830	Oxomalonate	OC(=O)C(=O)C(O)=O	0
C00937	(R)-Lactaldehyde	C[C@@H](O)C=O	0
C00957	Mercaptopyruvate	OC(=O)C(=O)CS	0
C00969	3-Hydroxypropanal	OCCC=O	0
C01013	3-Hydroxypropanoate	OCCC(O)=O	0
C01146	2-Hydroxy-3-oxopropanoate	OC(C=O)C(O)=O	0
C01380	Ethylene glycol	OCCO	0
C01412	Butanal	CCCC=O	0
C01471	Acrolein	C=CC=O	0
C01845	Propan-2-ol	CC(C)O	0
C01888	Aminoacetone	CC(=O)C[NH3+]	1
C02001	Allyl alcohol	OCC=C	0
C02287	Hydroxymalonate	OC(C(O)=O)C(O)=O	0
C02426	L-Glyceraldehyde	OC[C@H](O)C=O	0
C02457	Propane-1,3-diol	OCCCO	0
C02912	(R)-Propane-1,2-diol	C[C@@H](O)CO	0
C02917	(S)-Propane-1,2-diol	C[C@H](O)CO	0
C03167	Phosphonoacetaldehyde	OP(O)(=O)CC=O	0
C03194	(R)-1-Aminopropan-2-ol	C[C@@H](O)C[NH3+]	1
C03232	3-Phosphonooxypyruvate	OC(=O)C(=O)COP(O)([O-])=O	-1
C03505	Hydroxyacetone phosphate	CC(=O)COP(O)(O)=O	0
C03894	Propane-1,2-diol 1-phosphate	CC(O)COP(O)(O)=O	0
C05123	2-Hydroxyethanesulfonate	OCCS([O-])(=O)=O	-1
C05235	Hydroxyacetone	CC(=O)CO	0
C05528	3-Sulfopyruvate	OC(=O)C(=O)CS([O-])(=O)=O	-1
C05823	3-Mercaptolactate	O[C@@H](CS)C(O)=O	0
C05979	Propane-1-ol	CCCO	0
C05985	2-Propynal	O=CC#C	0
C05986	2-Propyn-1-ol	OCC#C	0
C06142	1-Butanol	CCCCO	0
C06451	2-Hydroxyethylphosphonate	OCCP(O)(O)=O	0
C06735	Aminoacetaldehyde	[NH3+]CC=O	1
C06753	2-Chloroethanol	OCCCl	0
C06754	Chloroacetaldehyde	ClCC=O	0
C10920	Glycidol	OCC1CO1	0
C11499	(S)-3-Sulfolactate	O[C@H](CS([O-])(=O)=O)C(O)=O	-1
C11537	(2R)-3-Sulfolactate	O[C@@H](CS([O-])(=O)=O)C(O)=O	-1
C11822	2-Aminomalonate semialdehyde	[NH3+][C@@H](C=O)C(O)=O	1
C14448	Glyoxal	O=CC=O	0
C16849	Hydroxypyruvaldehyde phosphate	OP(O)(=O)OCC(=O)C=O	0
C19246	Glycidaldehyde	O=CC1CO1	0
C00036	Oxaloacetate	OC(=O)CC(=O)C(O)=O	0
C00109	2-Oxobutanoate	CCC(=O)C(O)=O	0
C00114	Choline	C[N+](C)(C)CCO	1
C00149	(S)-Malate	O[C@@H](CC(O)=O)C(O)=O	0
C00164	Acetoacetate	CC(=O)CC(O)=O	0
C00181	D-Xylose	O[C@@H]1COC(O)[C@H](O)[C@H]1O	0
C00188	L-Threonine	C[C@@H](O)[C@H]([NH3+])C(O)=O	1
C00199	D-Ribulose 5-phosphate	OCC(=O)[C@H](O)[C@H](O)COP(O)(O)=O	0
C00231	D-Xylulose 5-phosphate	OCC(=O)[C@@H](O)[C@H](O)COP(O)(O)=O	0
C00232	Succinate semialdehyde	OC(=O)CCC=O	0
C00263	L-Homoserine	[NH3+][C@@H](CCO)C(O)=O	1
C00279	D-Erythrose 4-phosphate	O[C@H](COP(O)(O)=O)[C@@H](O)C=O	0
C00282	MISSING	[H][H]	0
C00309	D-Ribulose	OCC1(O)OC[C@@H](O)[C@H]1O	0
C00310	D-Xylulose	OCC1(O)OC[C@@H](O)[C@@H]1O	0
C00312	L-Xylulose	OCC1(O)OC[C@H](O)[C@H]1O	0
C00349	2-Methyl-3-oxopropanoate	CC(C=O)C(O)=O	0
C00379	Xylitol	OC[C@H](O)[C@@H](O)[C@H](O)CO	0
C00441	L-Aspartate 4-semialdehyde	[NH3+][C@@H](CC=O)C(O)=O	1
C00474	Ribitol	OC[C@H](O)[C@H](O)[C@H](O)CO	0
C00497	(R)-Malate	O[C@H](CC(O)=O)C(O)=O	0
C00502	D-Xylonate	OC[C@@H](O)[C@H](O)[C@@H](O)C(O)=O	0
C00503	Erythritol	OC[C@H](O)[C@H](O)CO	0
C00508	L-Ribulose	OCC1(O)OC[C@H](O)[C@@H]1O	0
C00532	L-Arabitol	OC[C@H](O)C(O)[C@@H](O)CO	0
C00552	meso-Tartaric acid	O[C@@H]([C@@H](O)C(O)=O)C(O)=O	0
C00557	Cyclopentanone	O=C1CCCC1	0
C00576	Betaine aldehyde	C[N+](C)(C)CC=O	1
C00684	2-Dehydro-3-deoxy-L-arabinonate	OC[C@H](O)CC(=O)C(O)=O	0
C00741	Diacetyl	CC(=O)C(C)=O	0
C00810	(R)-Acetoin	C[C@@H](O)C(C)=O	0
C00989	4-Hydroxybutanoic acid	OCCCC(O)=O	0
C01068	D-Ribitol 5-phosphate	OC[C@H](O)[C@H](O)[C@H](O)COP(O)(O)=O	0
C01089	(R)-3-Hydroxybutanoate	C[C@@H](O)CC(O)=O	0
C01157	Hydroxyproline	O[C@H]1C[NH2+][C@@H](C1)C(O)=O	1
C01188	3-Hydroxy-2-methylpropanoate	CC(CO)C(O)=O	0
C01390	Prenol	CC(C)=CCO	0
C01488	D-Apiose	OCC(O)(CO)[C@@H](O)C=O	0
C01510	L-Xylose	OC[C@@H]1OC(O)[C@@H](O)[C@@H]1O	0
C01569	D-Apiitol	OC[C@H](O)C(O)(CO)CO	0
C01620	Threonate	OC[C@H](O)[C@@H](O)C(O)=O	0
C01769	(S)-Acetoin	C[C@H](O)C(C)=O	0
C01877	4-Oxoproline	OC(=O)[C@@H]1CC(=O)C[NH2+]1	1
C01904	D-Arabitol	OC[C@@H](O)C(O)[C@H](O)CO	0
C02020	Cyclopentanol	OC1CCCC1	0
C02022	D-Erythrulose	OC[C@@H](O)C(=O)CO	0
C02045	L-Erythrulose	OC[C@H](O)C(=O)CO	0
C02497	2-Butyne-1,4-diol	OCC#CCO	0
C02647	4-Guanidinobutanal	NC(=[NH2+])NCCCC=O	1
C02648	4-Hydroxy-2-butynal	OCC#CC=O	0
C02804	5-Hydroxypentanoate	OCCCCC(O)=O	0
C02895	Xylitol 5-phosphate	OC[C@H](O)[C@@H](O)[C@H](O)COP(O)(O)=O	0
C02928	2-Dehydro-D-xylonate	OC[C@@H](O)[C@H](O)C(=O)C(O)=O	0
C02994	L-Xylono-1,4-lactone	OC[C@@H]1OC(=O)[C@@H](O)[C@@H]1O	0
C03044	(R,R)-Butane-2,3-diol	C[C@@H](O)[C@@H](C)O	0
C03064	3-Dehydro-L-threonate	OCC(=O)[C@@H](O)C(O)=O	0
C03088	5-Hydroxymethyluracil	OCC1=CNC(=O)NC1=O	0
C03197	(S)-3-Hydroxybutanoate	C[C@H](O)CC(O)=O	0
C03273	5-Oxopentanoate	OC(=O)CCCC=O	0
C03393	4-Phospho-D-erythronate	O[C@H](COP(O)(O)=O)[C@@H](O)C(O)=O	0
C03394	Erythrulose 1-phosphate	OC[C@H](O)C(=O)COP(O)(O)=O	0
C03459	2-Hydroxy-3-oxosuccinate	OC(C(O)=O)C(=O)C(O)=O	0
C03494	D-Erythritol 4-phosphate	OC[C@H](O)[C@H](O)COP(O)(O)=O	0
C03508	L-2-Amino-3-oxobutanoic acid	CC(=O)[C@H]([NH3+])C(O)=O	1
C03604	D-Erythrulose 4-phosphate	OCC(=O)[C@H](O)COP(O)(O)=O	0
C05406	5-Hydroxy-2,4-dioxopentanoate	OCC(=O)CC(=O)C(O)=O	0
C05519	L-Allothreonine	C[C@H](O)[C@H]([NH3+])C(O)=O	1
C05984	2-Hydroxybutanoic acid	CC[C@H](O)C(O)=O	0
C06001	(S)-3-Hydroxyisobutyrate	C[C@@H](CO)C(O)=O	0
C06002	(S)-Methylmalonate semialdehyde	C[C@@H](C=O)C(O)=O	0
C06029	L-threo-3-Methylmalate	C[C@@H]([C@H](O)C(O)=O)C(O)=O	0
C06030	Methyloxaloacetate	C[C@H](C(O)=O)C(=O)C(O)=O	0
C06032	D-erythro-3-Methylmalate	C[C@@H]([C@@H](O)C(O)=O)C(O)=O	0
C06054	2-Oxo-3-hydroxy-4-phosphobutanoate	O[C@H](COP(O)(O)=O)C(=O)C(O)=O	0
C06055	O-Phospho-4-hydroxy-L-threonine	[NH3+][C@@H]([C@H](O)COP(O)(O)=O)C(O)=O	1
C06145	3-Butyn-1-al	O=CCC#C	0
C06146	3-Butyn-1-ol	OCCC#C	0
C06611	trans-3-Chloro-2-propene-1-ol	OC\C=C\Cl	0
C06612	cis-3-Chloro-2-propene-1-ol	OC\C=C/Cl	0
C06613	trans-3-Chloroallyl aldehyde	Cl\C=C\C=O	0
C07328	3-Methylbutanol	CC(C)CCO	0
C07329	3-Methylbutanal	CC(C)CC=O	0
C07330	3-Methyl-2-butenal	CC(C)=CC=O	0
C07335	2-Amino-3-oxo-4-phosphonooxybutyrate	[NH3+][C@H](C(O)=O)C(=O)COP(O)([O-])=O	0
C07490	Trichloroethanol	OCC(Cl)(Cl)Cl	0
C11476	L-Arabinose	OC[C@H](O)[C@H](O)[C@@H](O)C=O	0
C14866	Chloral	ClC(Cl)(Cl)C=O	0
C16348	cis-3-Chloroallyl aldehyde	Cl\C=C/C=O	0
C17146	4-Guanidino-1-butanol	NC(=[NH2+])NCCCCO	1
C17206	Uracil 5-carbaldehyde	O=CC1=CNC(=O)NC1=O	0
C00026	2-Oxoglutarate	OC(=O)CCC(=O)C(O)=O	0
C00031	D-Glucose	OC[C@H]1OC(O)[C@H](O)[C@@H](O)[C@@H]1O	0
C00092	D-Glucose 6-phosphate	OC1O[C@H](COP(O)(O)=O)[C@@H](O)[C@H](O)[C@H]1O	0
C00137	myo-Inositol	O[C@H]1[C@H](O)[C@@H](O)[C@H](O)[C@H](O)[C@@H]1O	0
C00181	D-Xylose	O[C@@H]1COC(O)[C@H](O)[C@H]1O	0
C00198	D-Glucono-1,5-lactone	OC[C@H]1OC(=O)[C@H](O)[C@@H](O)[C@@H]1O	0
C00216	D-Arabinose	O[C@@H]1COC(O)[C@@H](O)[C@@H]1O	0
C00221	beta-D-Glucose	OC[C@H]1O[C@@H](O)[C@H](O)[C@@H](O)[C@@H]1O	0
C00257	D-Gluconic acid	OC[C@@H](O)[C@@H](O)[C@H](O)[C@@H](O)C(O)=O	0
C00259	L-Arabinose	O[C@H]1COC(O)[C@H](O)[C@H]1O	0
C00273	5-Dehydro-D-fructose	OCC(=O)[C@@H](O)[C@H](O)C(=O)CO	0
C00282	MISSING	[H][H]	0
C00309	D-Ribulose	OCC1(O)OC[C@@H](O)[C@H]1O	0
C00310	D-Xylulose	OCC1(O)OC[C@@H](O)[C@@H]1O	0
C00312	L-Xylulose	OCC1(O)OC[C@H](O)[C@H]1O	0
C00345	6-Phospho-D-gluconate	O[C@H](COP(O)(O)=O)[C@@H](O)[C@H](O)[C@@H](O)C(O)=O	0
C00379	Xylitol	OC[C@H](O)[C@@H](O)[C@H](O)CO	0
C00474	Ribitol	OC[C@H](O)[C@H](O)[C@H](O)CO	0
C00522	(R)-Pantoate	CC(C)(CO)[C@@H](O)C(O)=O	0
C00532	L-Arabitol	OC[C@H](O)C(O)[C@@H](O)CO	0
C00618	3-Dehydro-L-gulonate	OC[C@H](O)[C@@H](O)C(=O)[C@H](O)C(O)=O	0
C00644	D-Mannitol 1-phosphate	OC[C@@H](O)[C@@H](O)[C@H](O)[C@H](O)COP(O)(O)=O	0
C00652	D-Arabinono-1,4-lactone	OC[C@H]1OC(=O)[C@@H](O)[C@@H]1O	0
C00691	2,4,6/3,5-Pentahydroxycyclohexanone	O[C@H]1[C@H](O)[C@@H](O)C(=O)[C@@H](O)[C@@H]1O	0
C00770	L-Idonate	OC[C@H](O)[C@@H](O)[C@H](O)[C@@H](O)C(O)=O	0
C00794	D-Sorbitol	OC[C@H](O)[C@@H](O)[C@H](O)[C@H](O)CO	0
C00800	L-Gulonate	OC[C@H](O)[C@@H](O)[C@H](O)[C@H](O)C(O)=O	0
C00860	L-Histidinol	[NH3+][C@H](CO)Cc1c[nH]c[nH+]1	2
C00880	D-Galactonate	OC[C@@H](O)[C@H](O)[C@H](O)[C@@H](O)C(O)=O	0
C00962	beta-D-Galactose	OC[C@H]1O[C@@H](O)[C@H](O)[C@@H](O)[C@H]1O	0
C00966	2-Dehydropantoate	CC(C)(CO)C(=O)C(O)=O	0
C01012	(R)-Pantolactone	CC1(C)COC(=O)[C@@H]1O	0
C01015	cis-4-Hydroxy-L-proline	O[C@@H]1C[NH2+][C@@H](C1)C(O)=O	1
C01053	(R)-4-Dehydropantoate	CC(C)(C=O)[C@@H](O)C(O)=O	0
C01062	5-Dehydro-D-gluconate	OCC(=O)[C@@H](O)[C@H](O)[C@@H](O)C(O)=O	0
C01087	(R)-2-Hydroxyglutarate	O[C@H](CCC(O)=O)C(O)=O	0
C01125	Dihydro-4,4-dimethyl-2,3-furandione	CC1(C)COC(=O)C1=O	0
C01147	2-Hydroxycyclohexan-1-one	OC1CCCCC1=O	0
C01172	beta-D-Glucose 6-phosphate	O[C@@H]1O[C@H](COP(O)(O)=O)[C@@H](O)[C@H](O)[C@H]1O	0
C01214	1-Amino-1-deoxy-scyllo-inositol	[NH3+][C@H]1[C@H](O)[C@@H](O)[C@H](O)[C@@H](O)[C@@H]1O	1
C01218	6-Phospho-2-dehydro-D-gluconate	O[C@H](COP(O)(O)=O)[C@@H](O)[C@H](O)C(=O)C(O)=O	0
C01236	D-Glucono-1,5-lactone 6-phosphate	O[C@H]1[C@H](O)[C@@H](COP(O)(O)=O)OC(=O)[C@@H]1O	0
C01582	Galactose	OC[C@@H](O)[C@H](O)[C@H](O)[C@@H](O)C=O	0
C01697	Galactitol	OC[C@H](O)[C@@H](O)[C@@H](O)[C@H](O)CO	0
C01877	4-Oxoproline	OC(=O)[C@@H]1CC(=O)C[NH2+]1	1
C01929	L-Histidinal	[NH3+][C@@H](Cc1c[nH]c[nH+]1)C=O	2
C02132	Acetylpyruvate	CC(=O)CC(=O)C(O)=O	0
C02266	D-Xylonolactone	O[C@@H]1COC(=O)[C@H](O)[C@H]1O	0
C02431	L-Rhamnofuranose	C[C@H](O)[C@@H]1OC(O)[C@H](O)[C@@H]1O	0
C02670	D-Glucuronolactone	O[C@@H](C=O)[C@H]1OC(=O)[C@@H](O)[C@H]1O	0
C02780	2,5-Didehydro-D-gluconate	OCC(=O)[C@@H](O)[C@H](O)C(=O)C(O)=O	0
C02782	2-Deoxy-D-gluconate	OC[C@@H](O)[C@@H](O)[C@H](O)CC(O)=O	0
C02810	Alditol 6-phosphate	OCC(O)C(O)C(O)C(O)COP(O)(O)=O	0
C02895	Xylitol 5-phosphate	OC[C@H](O)[C@@H](O)[C@H](O)COP(O)(O)=O	0
C02991	L-Rhamnono-1,4-lactone	C[C@H](O)[C@@H]1OC(=O)[C@H](O)[C@@H]1O	0
C03107	D-Glucono-1,4-lactone	OCC(O)[C@H]1OC(=O)[C@H](O)[C@H]1O	0
C03196	(S)-2-Hydroxyglutarate	O[C@@H](CCC(O)=O)C(O)=O	0
C03251	Aldohexose 6-phosphate	O[C@H](COP(O)(O)=O)[C@@H](O)[C@H](O)[C@@H](O)C=O	0
C03277	Imidazol-5-yl-pyruvate	OC(=O)C(=O)Cc1c[nH+]c[nH]1	1
C03342	2-Dehydro-D-galactonate	OC[C@@H](O)[C@H](O)[C@H](O)C(=O)C(O)=O	0
C03589	4-Hydroxy-2-oxopentanoate	CC(O)CC(=O)C(O)=O	0
C03817	(S)-3-(Imidazol-5-yl)lactate	O[C@@H](Cc1c[nH+]c[nH]1)C(O)=O	1
C03826	2-Dehydro-3-deoxy-D-xylonate	OC[C@@H](O)CC(=O)C(O)=O	0
C03926	3-Dehydro-2-deoxy-D-gluconate	OC[C@@H](O)[C@@H](O)C(=O)CC(O)=O	0
C04053	5-Dehydro-4-deoxy-D-glucuronate	O[C@@H](CC(=O)C(O)=O)[C@@H](O)C=O	0
C04181	3-Hydroxy-3-methyl-2-oxobutanoic acid	CC(C)(O)C(=O)C(O)=O	0
C04272	(R)-2,3-Dihydroxy-3-methylbutanoate	CC(C)(O)[C@@H](O)C(O)=O	0
C04575	(4R,5S)-4,5,6-Trihydroxy-2,3-dioxohexanoate	OC[C@H](O)[C@@H](O)C(=O)C(=O)C(O)=O	0
C05394	3-Keto-beta-D-galactose	OC[C@H]1O[C@@H](O)[C@H](O)C(=O)[C@H]1O	0
C05406	5-Hydroxy-2,4-dioxopentanoate	OCC(=O)CC(=O)C(O)=O	0
C06019	D-arabino-Hex-3-ulose 6-phosphate	OC[C@@H](O)C(=O)[C@H](O)[C@H](O)COP(O)(O)=O	0
C06102	Adipate semialdehyde	OC(=O)CCCCC=O	0
C06103	6-Hydroxyhexanoic acid	OCCCCCC(O)=O	0
C06105	Cyclohexane-1,2-dione	O=C1CCCCC1=O	0
C06153	scyllo-Inositol	O[C@H]1[C@H](O)[C@@H](O)[C@H](O)[C@@H](O)[C@@H]1O	0
C06473	2-Keto-D-gluconic acid	OC[C@@H](O)[C@@H](O)[C@H](O)C(=O)C(O)=O	0
C06814	D-Xylose-5-phosphate	O[C@H](COP(O)(O)=O)[C@H](O)[C@@H](O)C=O	0
C06892	2-Deoxy-5-keto-D-gluconic acid	OCC(=O)[C@@H](O)[C@H](O)CC(O)=O	0
C08492	3-Hexenol	CC\C=C/CCO	0
C10906	D-Fructose	OC[C@@H](O)[C@@H](O)[C@H](O)C(=O)CO	0
C11434	2-C-Methyl-D-erythritol 4-phosphate	C[C@](O)(CO)[C@H](O)COP(O)(O)=O	0
C11437	1-Deoxy-D-xylulose 5-phosphate	CC(=O)[C@@H](O)[C@H](O)COP(O)(O)=O	0
C11496	(R)-2-Hydroxypropyl-CoM	C[C@@H](O)CSCCS([O-])(=O)=O	-1
C11497	2-Oxopropyl-CoM	CC(=O)CSCCS([O-])(=O)=O	-1
C11498	(S)-2-Hydroxypropyl-CoM	C[C@H](O)CSCCS([O-])(=O)=O	-1
C15673	2-Dehydro-L-idonate	OC[C@H](O)[C@@H](O)[C@H](O)C(=O)C(O)=O	0
C16159	2-Formylglutarate	OC(=O)CCC(C=O)C(O)=O	0
C16310	3-Hexenal	CC\C=C/CC=O	0
C16390	(S)-2-(Hydroxymethyl)glutarate	OCC(CCC(O)=O)C(O)=O	0
C17576	3-Keto-scyllo-inosamine	[NH3+][C@H]1[C@H](O)[C@@H](O)[C@H](O)C(=O)[C@@H]1O	1
C17577	myo-Inosose-5	O[C@@H]1[C@H](O)[C@@H](O)C(=O)[C@@H](O)[C@@H]1O	0
C00031	D-Glucose	OC[C@H]1OC(O)[C@H](O)[C@@H](O)[C@@H]1O	0
C00085	D-Fructose 6-phosphate	OCC1(O)O[C@H](COP(O)(O)=O)[C@@H](O)[C@@H]1O	0
C00092	D-Glucose 6-phosphate	OC1O[C@H](COP(O)(O)=O)[C@@H](O)[C@H](O)[C@H]1O	0
C00095	D-Fructose	OC[C@H]1OC(O)(CO)[C@@H](O)[C@@H]1O	0
C00124	D-Galactose	OC[C@H]1OC(O)[C@H](O)[C@@H](O)[C@H]1O	0
C00159	D-Mannose	OC[C@H]1OC(O)[C@@H](O)[C@@H](O)[C@@H]1O	0
C00191	D-Glucuronate	OC1O[C@@H]([C@@H](O)[C@H](O)[C@H]1O)C(O)=O	0
C00193	Aromatic aldehyde	O=Cc1ccccc1	0
C00221	beta-D-Glucose	OC[C@H]1O[C@@H](O)[C@H](O)[C@@H](O)[C@@H]1O	0
C00247	L-Sorbose	OCC1(O)OC[C@H](O)[C@@H](O)[C@@H]1O	0
C00261	Benzaldehyde	O=Cc1ccccc1	0
C00267	alpha-D-Glucose	OC[C@H]1O[C@H](O)[C@H](O)[C@@H](O)[C@@H]1O	0
C00273	5-Dehydro-D-fructose	OCC(=O)[C@@H](O)[C@H](O)C(=O)CO	0
C00275	D-Mannose 6-phosphate	OC1O[C@H](COP(O)(O)=O)[C@@H](O)[C@H](O)[C@@H]1O	0
C00282	MISSING	[H][H]	0
C00296	Quinate	O[C@@H]1C[C@@](O)(C[C@@H](O)[C@H]1O)C(O)=O	0
C00318	L-Carnitine	C[N+](C)(C)C[C@H](O)CC(O)=O	1
C00333	D-Galacturonate	OC1O[C@@H]([C@H](O)[C@H](O)[C@H]1O)C(O)=O	0
C00392	Mannitol	OC[C@@H](O)[C@@H](O)[C@H](O)[C@H](O)CO	0
C00414	Cyclohexanone	O=C1CCCCC1	0
C00418	(R)-Mevalonate	C[C@@](O)(CCO)CC(O)=O	0
C00472	p-Benzoquinone	O=C1C=CC(=O)C=C1	0
C00493	Shikimate	O[C@@H]1CC(=C[C@@H](O)[C@H]1O)C(O)=O	0
C00514	D-Mannonate	OC[C@@H](O)[C@@H](O)[C@H](O)[C@H](O)C(O)=O	0
C00556	Benzyl alcohol	OCc1ccccc1	0
C00558	D-Tagaturonate	OCC1(O)O[C@@H]([C@H](O)[C@@H]1O)C(O)=O	0
C00633	4-Hydroxybenzaldehyde	Oc1ccc(C=O)cc1	0
C00644	D-Mannitol 1-phosphate	OC[C@@H](O)[C@@H](O)[C@H](O)[C@H](O)COP(O)(O)=O	0
C00764	D-Sorbose	OCC1(O)OC[C@@H](O)[C@H](O)[C@H]1O	0
C00772	Mevaldate	CC1(O)CC(O)OC(=O)C1	0
C00794	D-Sorbitol	OC[C@H](O)[C@@H](O)[C@H](O)[C@H](O)CO	0
C00795	D-Tagatose	OCC1(O)OC[C@@H](O)[C@H](O)[C@@H]1O	0
C00800	L-Gulonate	OC[C@H](O)[C@@H](O)[C@H](O)[C@H](O)C(O)=O	0
C00817	D-Altronate	OC[C@@H](O)[C@@H](O)[C@@H](O)[C@H](O)C(O)=O	0
C00854	Cyclohexanol	OC1CCCCC1	0
C00905	D-Fructuronate	OCC1(O)O[C@@H]([C@@H](O)[C@@H]1O)C(O)=O	0
C00944	3-Dehydroquinate	O[C@@H]1C[C@@](O)(CC(=O)[C@H]1O)C(O)=O	0
C01019	6-Deoxy-L-galactose	C[C@@H]1OC(O)[C@@H](O)[C@H](O)[C@@H]1O	0
C01096	Sorbitol 6-phosphate	OC[C@H](O)[C@@H](O)[C@H](O)[C@H](O)COP(O)(O)=O	0
C01097	D-Tagatose 6-phosphate	OCC1(O)O[C@H](COP(O)(O)=O)[C@H](O)[C@@H]1O	0
C01115	L-Galactono-1,4-lactone	OC[C@H](O)[C@H]1OC(=O)[C@@H](O)[C@@H]1O	0
C01236	D-Glucono-1,5-lactone 6-phosphate	O[C@H]1[C@H](O)[C@@H](COP(O)(O)=O)OC(=O)[C@@H]1O	0
C01295	2D-5-O-Methyl-2,3,5/4,6-pentahydroxycyclohexanone	CO[C@H]1[C@H](O)[C@@H](O)[C@@H](O)C(=O)[C@@H]1O	0
C01452	Sorbose	OC[C@@H](O)[C@H](O)[C@@H](O)C(=O)CO	0
C01489	D-Iditol	OC[C@@H](O)[C@H](O)[C@@H](O)[C@H](O)CO	0
C01507	L-Iditol	OC[C@H](O)[C@@H](O)[C@H](O)[C@@H](O)CO	0
C01697	Galactitol	OC[C@H](O)[C@@H](O)[C@@H](O)[C@H](O)CO	0
C01719	L-Fructose	OC[C@@H]1OC(O)(CO)[C@H](O)[C@H]1O	0
C01722	L-Glucitol	OC[C@H](O)[C@H](O)[C@@H](O)[C@H](O)CO	0
C01825	L-Galactose	OC[C@@H]1OC(O)[C@@H](O)[C@H](O)[C@@H]1O	0
C02024	D-Mannuronate	OC1O[C@@H]([C@@H](O)[C@H](O)[C@@H]1O)C(O)=O	0
C02323	Salicyl alcohol	OCc1ccccc1O	0
C02389	p-Benzosemiquinone	[O]c1ccc(O)cc1	0
C02636	3-Dehydrocarnitine	C[N+](C)(C)CC(=O)CC(O)=O	1
C02637	3-Dehydroshikimate	O[C@@H]1CC(=CC(=O)[C@H]1O)C(O)=O	0
C02652	5-Dehydroshikimate	O[C@@H]1C=C(CC(=O)[C@@H]1O)C(O)=O	0
C02669	D-Galactono-1,5-lactone	OC[C@H]1OC(=O)[C@H](O)[C@@H](O)[C@H]1O	0
C02779	2-Dehydro-D-glucose	OC[C@H]1O[C@@H](O)C(=O)[C@@H](O)[C@@H]1O	0
C02782	2-Deoxy-D-gluconate	OC[C@@H](O)[C@@H](O)[C@H](O)CC(O)=O	0
C02888	Sorbose 1-phosphate	OC[C@H](O)[C@@H](O)[C@H](O)C(=O)COP(O)(O)=O	0
C03067	3-Hydroxybenzaldehyde	Oc1cccc(C=O)c1	0
C03107	D-Glucono-1,4-lactone	OCC(O)[C@H]1OC(=O)[C@H](O)[C@H]1O	0
C03351	3-Hydroxybenzyl alcohol	OCc1cccc(O)c1	0
C03365	5-O-Methyl-myo-inositol	CO[C@@H]1[C@@H](O)[C@H](O)[C@H](O)[C@H](O)[C@H]1O	0
C03383	D-Galactono-1,4-lactone	OC[C@@H](O)[C@@H]1OC(=O)[C@H](O)[C@H]1O	0
C03499	Ethyl (R)-3-hydroxybutanoate	CCOC(=O)C[C@@H](C)O	0
C03500	Ethyl 3-oxobutanoate	CCOC(=O)CC(C)=O	0
C03671	2-Pyrone-4,6-dicarboxylate	OC(=O)C1=CC(=CC(=O)O1)C(O)=O	0
C03844	D-Pinitol	CO[C@@H]1[C@@H](O)[C@@H](O)[C@H](O)[C@H](O)[C@H]1O	0
C03926	3-Dehydro-2-deoxy-D-gluconate	OC[C@@H](O)[C@@H](O)C(=O)CC(O)=O	0
C04280	1-Guanidino-1-deoxy-scyllo-inositol	NC(=[NH2+])N[C@@H]1[C@@H](O)[C@H](O)[C@@H](O)[C@H](O)[C@H]1O	1
C04670	(1S,4S)-4-Hydroxy-3-oxocyclohexane-1-carboxylate	O[C@H]1CC[C@@H](CC1=O)C(O)=O	0
C04673	1D-1-Guanidino-1-deoxy-3-dehydro-scyllo-inositol	NC(=[NH2+])N[C@H]1[C@H](O)[C@@H](O)[C@H](O)C(=O)[C@@H]1O	1
C04687	(1S,3R,4S)-3,4-Dihydroxycyclohexane-1-carboxylate	O[C@H]1CC[C@@H](C[C@H]1O)C(O)=O	0
C05345	beta-D-Fructose 6-phosphate	OC[C@@]1(O)O[C@H](COP(O)(O)=O)[C@@H](O)[C@@H]1O	0
C05375	2-Hydroxy-2-hydropyrone-4,6-dicarboxylate	OC1OC(=CC(=C1)C(O)=O)C(O)=O	0
C05585	Gentisate aldehyde	Oc1ccc(O)c(C=O)c1	0
C06006	(S)-2-Aceto-2-hydroxybutanoate	CC[C@](O)(C(C)=O)C(O)=O	0
C06007	(R)-2,3-Dihydroxy-3-methylpentanoate	CC[C@@](C)(O)[C@@H](O)C(O)=O	0
C06202	Salicylaldehyde	Oc1ccccc1C=O	0
C06311	Galactitol 1-phosphate	OC[C@H](O)[C@@H](O)[C@@H](O)[C@H](O)COP(O)(O)=O	0
C06312	L-Tagatose 6-phosphate	OCC1(O)O[C@@H](COP(O)(O)=O)[C@@H](O)[C@H]1O	0
C06678	4-Sulfobenzyl alcohol	OCc1ccc(cc1)S([O-])(=O)=O	-1
C06679	4-Sulfobenzaldehyde	[O-]S(=O)(=O)c1ccc(C=O)cc1	-1
C10792	Gentisyl alcohol	OCc1cc(O)ccc1O	0
C14463	(R)-3-Hydroxy-3-methyl-2-oxopentanoate	CC[C@@](C)(O)C(=O)C(O)=O	0
C15025	(S)-Carnitine	C[N+](C)(C)C[C@@H](O)CC(O)=O	1
C15930	L-Galactonate	OC[C@H](O)[C@@H](O)[C@@H](O)[C@H](O)C(O)=O	0
C17356	2-Formyloxymethylclavam	O=COC[C@H]1CN2[C@H](CC2=O)O1	0
C17361	2-Hydroxyethylclavam	OCC[C@H]1CN2[C@H](CC2=O)O1	0
C17467	p-Hydroxybenzyl alcohol	OCc1ccc(O)cc1	0
C18028	L-Fucono-1,5-lactone	C[C@@H]1OC(=O)[C@@H](O)[C@H](O)[C@@H]1O	0
C18316	2-Hydroxy-5-methylquinone	CC1=CC(=O)C(O)=CC1=O	0
C18317	2,4,5-Trihydroxytoluene	Cc1cc(O)c(O)cc1O	0
C19679	L-Sorbosone	OC[C@H](O)[C@@H](O)[C@H](O)C(=O)C=O	0
C00001	H20	O	0
C00014	MISSING	[NH4+]	1
C00022	Pyruvate	CC(=O)C(O)=O	0
C00036	Oxaloacetate	OC(=O)CC(=O)C(O)=O	0
C00037	Glycine	[NH3+]CC(O)=O	1
C00041	L-Alanine	C[C@H]([NH3+])C(O)=O	1
C00048	Glyoxylate	OC(=O)C=O	0
C00049	L-Aspartate	[NH3+][C@@H](CC(O)=O)C(O)=O	1
C00064	L-Glutamine	NC(=O)CC[C@H]([NH3+])C(O)=O	1
C00065	L-Serine	[NH3+][C@@H](CO)C(O)=O	1
C00067	Formaldehyde	C=O	0
C00084	Acetaldehyde	CC=O	0
C00097	L-Cysteine	[NH3+][C@@H](CS)C(O)=O	1
C00099	beta-Alanine	[NH3+]CCC(O)=O	1
C00109	2-Oxobutanoate	CCC(=O)C(O)=O	0
C00133	D-Alanine	C[C@@H]([NH3+])C(O)=O	1
C00134	Putrescine	[NH3+]CCCC[NH3+]	2
C00141	3-Methyl-2-oxobutanoic acid	CC(C)C(=O)C(O)=O	0
C00152	L-Asparagine	NC(=O)C[C@H]([NH3+])C(O)=O	1
C00168	Hydroxypyruvate	OCC(=O)C(O)=O	0
C00189	Ethanolamine	[NH3+]CCO	1
C00207	Acetone	CC(C)=O	0
C00218	MISSING	C[NH3+]	1
C00222	3-Oxopropanoate	OC(=O)CC=O	0
C00232	Succinate semialdehyde	OC(=O)CCC=O	0
C00245	Taurine	[NH3+]CCS([O-])(=O)=O	0
C00266	Glycolaldehyde	OCC=O	0
C00282	MISSING	[H][H]	0
C00334	4-Aminobutanoate	[NH3+]CCCC(O)=O	1
C00349	2-Methyl-3-oxopropanoate	CC(C=O)C(O)=O	0
C00402	D-Aspartate	[NH3+][C@H](CC(O)=O)C(O)=O	1
C00433	2,5-Dioxopentanoate	OC(=O)C(=O)CCC=O	0
C00441	L-Aspartate 4-semialdehyde	[NH3+][C@@H](CC=O)C(O)=O	1
C00506	L-Cysteate	[NH3+][C@@H](CS([O-])(=O)=O)C(O)=O	0
C00546	Methylglyoxal	CC(=O)C=O	0
C00555	4-Aminobutyraldehyde	[NH3+]CCCC=O	1
C00577	D-Glyceraldehyde	OC[C@@H](O)C=O	0
C00593	Sulfoacetaldehyde	[O-]S(=O)(=O)CC=O	-1
C00606	3-Sulfino-L-alanine	[NH3+][C@@H](CS(O)=O)C([O-])=O	0
C00740	D-Serine	[NH3+][C@H](CO)C(O)=O	1
C00793	D-Cysteine	[NH3+][C@H](CS)C(O)=O	1
C00797	Ethylamine	CC[NH3+]	1
C00819	D-Glutamine	NC(=O)CC[C@@H]([NH3+])C(O)=O	1
C00830	Oxomalonate	OC(=O)C(=O)C(O)=O	0
C00855	D-Methionine	CSCC[C@@H]([NH3+])C(O)=O	1
C00872	Aminomalonate	[NH3+]C(C(O)=O)C(O)=O	1
C00937	(R)-Lactaldehyde	C[C@@H](O)C=O	0
C00940	2-Oxoglutaramate	NC(=O)CCC(=O)C(O)=O	0
C00957	Mercaptopyruvate	OC(=O)C(=O)CS	0
C00986	1,3-Diaminopropane	[NH3+]CCC[NH3+]	2
C01005	O-Phospho-L-serine	[NH3+][C@@H](COP(O)([O-])=O)C(O)=O	0
C01165	L-Glutamate 5-semialdehyde	[NH3+][C@@H](CCC=O)C(O)=O	1
C01180	4-Methylthio-2-oxobutanoic acid	CSCCC(=O)C(O)=O	0
C01799	D-Norvaline	CCC[C@@H]([NH3+])C(O)=O	1
C01826	L-Norvaline	CCC[C@H]([NH3+])C(O)=O	1
C01888	Aminoacetone	CC(=O)C[NH3+]	1
C01905	D-Asparagine	NC(=O)C[C@@H]([NH3+])C(O)=O	1
C02261	D-2-Aminobutyrate	CC[C@@H]([NH3+])C(O)=O	1
C02356	(S)-2-Aminobutanoate	CC[C@H]([NH3+])C(O)=O	1
C02362	2-Oxosuccinamate	NC(=O)CC(=O)C(O)=O	0
C02532	O-Phospho-D-serine	[NH3+][C@H](COP(O)([O-])=O)C(O)=O	0
C02798	3-Phosphonopyruvate	OC(=O)C(=O)CP(O)(O)=O	0
C02800	4,5-Dioxopentanoate	OC(=O)CCC(=O)C=O	0
C02903	omega-Aminoaldehyde	[NH3+]CCCC=O	1
C03167	Phosphonoacetaldehyde	OP(O)(=O)CC=O	0
C03194	(R)-1-Aminopropan-2-ol	C[C@@H](O)C[NH3+]	1
C03232	3-Phosphonooxypyruvate	OC(=O)C(=O)COP(O)([O-])=O	-1
C03283	L-2,4-Diaminobutanoate	[NH3+]CC[C@H]([NH3+])C(O)=O	2
C03284	L-3-Aminoisobutanoate	C[C@@H](C[NH3+])C(O)=O	1
C03401	3-Amino-L-alanine	[NH3+]C[C@H]([NH3+])C(O)=O	2
C03459	2-Hydroxy-3-oxosuccinate	OC(C(O)=O)C(=O)C(O)=O	0
C03557	2-Aminoethylphosphonate	[NH3+]CCP(O)(O)=O	1
C03741	(S)-4-Amino-5-oxopentanoate	[NH3+][C@@H](CCC(O)=O)C=O	1
C05145	3-Aminoisobutyric acid	CC(C[NH3+])C(O)=O	1
C05527	3-Sulfinylpyruvate	OC(=O)C(=O)CS(O)=O	0
C05528	3-Sulfopyruvate	OC(=O)C(=O)CS([O-])(=O)=O	-1
C05665	3-Aminopropanal	[NH3+]CCC=O	1
C05672	2-Amino-3-phosphonopropanoate	[NH3+]C(CP(O)(O)=O)C(O)=O	1
C06002	(S)-Methylmalonate semialdehyde	C[C@@H](C=O)C(O)=O	0
C06054	2-Oxo-3-hydroxy-4-phosphobutanoate	O[C@H](COP(O)(O)=O)C(=O)C(O)=O	0
C06055	O-Phospho-4-hydroxy-L-threonine	[NH3+][C@@H]([C@H](O)COP(O)(O)=O)C(O)=O	1
C06057	3-Aminopropane-1,2-diol	[NH3+]C[C@H](O)CO	1
C06255	2-Oxopentanoic acid	CCCC(=O)C(O)=O	0
C06417	D-Valine	CC(C)[C@@H]([NH3+])C(O)=O	1
C06735	Aminoacetaldehyde	[NH3+]CC=O	1
C06748	Isopropylamine	CC(C)[NH3+]	1
C11638	3-Amino-2-oxopropyl phosphate	[NH3+]CC(=O)COP(O)(O)=O	1
C11822	2-Aminomalonate semialdehyde	[NH3+][C@@H](C=O)C(O)=O	1
C14448	Glyoxal	O=CC=O	0
C16835	Succinic aldehyde	O=CCCC=O	0
C16849	Hydroxypyruvaldehyde phosphate	OP(O)(=O)OCC(=O)C=O	0
C19838	D-erythro-3-Hydroxyaspartate	[NH3+][C@H]([C@H](O)C(O)=O)C(O)=O	1
C00001	H20	O	0
C00014	MISSING	[NH4+]	1
C00025	L-Glutamate	[NH3+][C@@H](CCC(O)=O)C(O)=O	1
C00026	2-Oxoglutarate	OC(=O)CCC(=O)C(O)=O	0
C00047	L-Lysine	[NH3+]CCCC[C@H]([NH3+])C(O)=O	2
C00062	L-Arginine	NC(=[NH2+])NCCC[C@H]([NH3+])C(O)=O	2
C00073	L-Methionine	CSCC[C@H]([NH3+])C(O)=O	1
C00077	L-Ornithine	[NH3+]CCC[C@H]([NH3+])C(O)=O	2
C00123	L-Leucine	CC(C)C[C@H]([NH3+])C(O)=O	1
C00135	L-Histidine	[NH3+][C@@H](Cc1c[nH]c[nH+]1)C(O)=O	2
C00141	3-Methyl-2-oxobutanoic acid	CC(C)C(=O)C(O)=O	0
C00179	Agmatine	NC(=[NH2+])NCCCC[NH3+]	2
C00183	L-Valine	CC(C)[C@H]([NH3+])C(O)=O	1
C00217	D-Glutamate	[NH3+][C@H](CCC(O)=O)C(O)=O	1
C00233	4-Methyl-2-oxopentanoate	CC(C)CC(=O)C(O)=O	0
C00261	Benzaldehyde	O=Cc1ccccc1	0
C00282	MISSING	[H][H]	0
C00322	2-Oxoadipate	OC(=O)CCCC(=O)C(O)=O	0
C00388	Histamine	[NH3+]CCc1c[nH]c[nH+]1	2
C00407	L-Isoleucine	CC[C@H](C)[C@H]([NH3+])C(O)=O	1
C00414	Cyclohexanone	O=C1CCCCC1	0
C00430	5-Aminolevulinate	[NH3+]CC(=O)CCC(O)=O	1
C00431	5-Aminopentanoate	[NH3+]CCCCC(O)=O	1
C00433	2,5-Dioxopentanoate	OC(=O)C(=O)CCC=O	0
C00515	D-Ornithine	[NH3+]CCC[C@@H]([NH3+])C(O)=O	2
C00571	Cyclohexylamine	[NH3+]C1CCCCC1	1
C00666	LL-2,6-Diaminoheptanedioate	[NH3+][C@@H](CCC[C@H]([NH3+])C(O)=O)C(O)=O	2
C00671	(S)-3-Methyl-2-oxopentanoic acid	CC[C@H](C)C(=O)C(O)=O	0
C00680	meso-2,6-Diaminoheptanedioate	[NH3+][C@@H](CCC[C@@H]([NH3+])C(O)=O)C(O)=O	2
C00739	D-Lysine	[NH3+]CCCC[C@@H]([NH3+])C(O)=O	2
C00792	D-Arginine	NC(=[NH2+])NCCC[C@@H]([NH3+])C(O)=O	2
C00902	2-Oxohexanoic acid	CCCCC(=O)C(O)=O	0
C00956	L-2-Aminoadipate	[NH3+][C@@H](CCCC(O)=O)C(O)=O	1
C01100	L-Histidinol phosphate	[NH3+][C@H](COP(O)(O)=O)Cc1c[nH]c[nH+]1	2
C01110	5-Amino-2-oxopentanoic acid	[NH3+]CCCC(=O)C(O)=O	1
C01165	L-Glutamate 5-semialdehyde	[NH3+][C@@H](CCC=O)C(O)=O	1
C01180	4-Methylthio-2-oxobutanoic acid	CSCCC(=O)C(O)=O	0
C01186	(3S,5S)-3,5-Diaminohexanoate	C[C@H]([NH3+])C[C@H]([NH3+])CC(O)=O	2
C01267	3-(Imidazol-4-yl)-2-oxopropyl phosphate	OP(O)(=O)OCC(=O)Cc1c[nH]c[nH+]1	1
C01298	1D-1-Guanidino-3-amino-1,3-dideoxy-scyllo-inositol	NC(=[NH2+])N[C@@H]1[C@@H](O)[C@H]([NH3+])[C@@H](O)[C@H](O)[C@H]1O	2
C01570	D-Leucine	CC(C)C[C@@H]([NH3+])C(O)=O	1
C01672	Cadaverine	[NH3+]CCCCC[NH3+]	2
C01854	Streptamine	[NH3+][C@H]1[C@H](O)[C@@H]([NH3+])[C@H](O)[C@@H](O)[C@@H]1O	2
C01933	L-Norleucine	CCCC[C@H]([NH3+])C(O)=O	1
C02132	Acetylpyruvate	CC(=O)CC(=O)C(O)=O	0
C02378	6-Aminohexanoate	[NH3+]CCCCCC(O)=O	1
C02486	(3R)-beta-Leucine	CC(C)[C@H]([NH3+])CC(O)=O	1
C02627	2-Deoxystreptamine	[NH3+][C@H]1C[C@@H]([NH3+])[C@H](O)[C@@H](O)[C@@H]1O	2
C02640	3-Methylbutanamine	CC(C)CC[NH3+]	1
C02647	4-Guanidinobutanal	NC(=[NH2+])NCCCC=O	1
C02652	5-Dehydroshikimate	O[C@@H]1C=C(CC(=O)[C@@H]1O)C(O)=O	0
C02714	N-Acetylputrescine	CC(=O)NCCCC[NH3+]	1
C02723	N-Methylputrescine	C[NH2+]CCCC[NH3+]	2
C02779	2-Dehydro-D-glucose	OC[C@H]1O[C@@H](O)C(=O)[C@@H](O)[C@@H]1O	0
C02800	4,5-Dioxopentanoate	OC(=O)CCC(=O)C=O	0
C03153	N5-Methyl-L-glutamine	CNC(=O)CC[C@H]([NH3+])C(O)=O	1
C03239	6-Amino-2-oxohexanoate	[NH3+]CCCCC(=O)C(O)=O	1
C03273	5-Oxopentanoate	OC(=O)CCCC=O	0
C03277	Imidazol-5-yl-pyruvate	OC(=O)C(=O)Cc1c[nH+]c[nH]1	1
C03341	2-Amino-4-oxopentanoic acid	CC(=O)C[C@@H]([NH3+])C(O)=O	1
C03467	beta-Ketoisocaproate	CC(C)C(=O)CC(O)=O	0
C03623	N-Methyl-2-oxoglutaramate	CNC(=O)CCC(=O)C(O)=O	0
C03656	(S)-5-Amino-3-oxohexanoic acid	C[C@H]([NH3+])CC(=O)CC(O)=O	1
C03752	2-Amino-2-deoxy-D-gluconate	[NH3+][C@H]([C@@H](O)[C@H](O)[C@H](O)CO)C(O)=O	1
C03771	5-Guanidino-2-oxopentanoate	NC(=[NH2+])NCCCC(=O)C(O)=O	1
C03871	L-2-Amino-6-oxoheptanedioate	[NH3+][C@@H](CCCC(=O)C(O)=O)C(O)=O	1
C03943	(2R,4S)-2,4-Diaminopentanoate	C[C@H]([NH3+])C[C@@H]([NH3+])C(O)=O	2
C04076	L-2-Aminoadipate 6-semialdehyde	[NH3+][C@@H](CCCC=O)C(O)=O	1
C04673	1D-1-Guanidino-1-deoxy-3-dehydro-scyllo-inositol	NC(=[NH2+])N[C@H]1[C@H](O)[C@@H](O)[C@H](O)C(=O)[C@@H]1O	1
C05127	N-Methylhistamine	Cn1c[nH+]c(CC[NH3+])c1	2
C05130	Imidazole-4-acetaldehyde	O=CCc1c[nH]c[nH+]1	1
C05161	2,5-Diaminohexanoate	CC([NH3+])CCC([NH3+])C(O)=O	2
C05572	4-Oxoglutaramate	NC(=O)C(=O)CCC(O)=O	0
C05825	2-Amino-5-oxohexanoate	CC(=O)CCC([NH3+])C(O)=O	1
C05827	Methylimidazole acetaldehyde	Cn1c[nH+]c(CC=O)c1	1
C05936	N4-Acetylaminobutanal	CC(=O)NCCCC=O	0
C06008	(3R)-3-Methyl-2-oxopentanoic acid	CC[C@@H](C)C(=O)C(O)=O	0
C06102	Adipate semialdehyde	OC(=O)CCCCC=O	0
C06418	D-Isoleucine	CC[C@@H](C)[C@@H]([NH3+])C(O)=O	1
C06419	D-Histidine	[NH3+][C@H](Cc1c[nH]c[nH+]1)C(O)=O	2
C06473	2-Keto-D-gluconic acid	OC[C@@H](O)[C@@H](O)[C@H](O)C(=O)C(O)=O	0
C07329	3-Methylbutanal	CC(C)CC=O	0
C08349	beta-D-Glucosamine	[NH3+][C@H]1[C@H](O)O[C@H](CO)[C@@H](O)[C@@H]1O	1
C10974	4-Methylaminobutanal	C[NH2+]CCCC=O	1
C12121	5-Deoxy-5-aminoshikimic acid	[NH3+][C@@H]1CC(=C[C@@H](O)[C@H]1O)C(O)=O	1
C12455	5-Aminopentanal	[NH3+]CCCCC=O	1
C12518	Glutaral	O=CCCCC=O	0
C15562	Benzylamine	[NH3+]Cc1ccccc1	1
C16673	Isoglutamine	NC(=O)C([NH3+])CCC(O)=O	1
C17209	2-Deoxy-scyllo-inosose	O[C@@H]1CC(=O)[C@@H](O)[C@H](O)[C@H]1O	0
C17211	2-Oxo-5-methylthiopentanoic acid	CSCCCC(=O)C(O)=O	0
C17213	Homomethionine	CSCCCC([NH3+])C(O)=O	1
C17576	3-Keto-scyllo-inosamine	[NH3+][C@H]1[C@H](O)[C@@H](O)[C@H](O)C(=O)[C@@H]1O	1
C17577	myo-Inosose-5	O[C@@H]1[C@H](O)[C@@H](O)C(=O)[C@@H](O)[C@@H]1O	0
C17578	neo-Inosamine-2	[NH3+][C@@H]1[C@H](O)[C@@H](O)[C@@H](O)[C@@H](O)[C@@H]1O	1
C17580	2-Deoxy-scyllo-inosamine	[NH3+][C@H]1C[C@@H](O)[C@H](O)[C@@H](O)[C@@H]1O	1
C17581	3-Amino-2,3-dideoxy-scyllo-inosose	[NH3+][C@H]1CC(=O)[C@H](O)[C@@H](O)[C@@H]1O	1
C00001	H20	O	0
C00022	Pyruvate	CC(=O)C(O)=O	0
C00033	Acetate	CC(O)=O	0
C00041	L-Alanine	C[C@H]([NH3+])C(O)=O	1
C00042	Succinate	OC(=O)CCC(O)=O	0
C00049	L-Aspartate	[NH3+][C@@H](CC(O)=O)C(O)=O	1
C00065	L-Serine	[NH3+][C@@H](CO)C(O)=O	1
C00084	Acetaldehyde	CC=O	0
C00111	Glycerone phosphate	OCC(=O)COP(O)(O)=O	0
C00116	Glycerol	OCC(O)CO	0
C00132	Methanol	CO	0
C00133	D-Alanine	C[C@@H]([NH3+])C(O)=O	1
C00149	(S)-Malate	O[C@@H](CC(O)=O)C(O)=O	0
C00160	Glycolate	OCC(O)=O	0
C00163	Propanoate	CCC(O)=O	0
C00168	Hydroxypyruvate	OCC(=O)C(O)=O	0
C00184	Glycerone	OCC(=O)CO	0
C00186	(S)-Lactate	C[C@H](O)C(O)=O	0
C00189	Ethanolamine	[NH3+]CCO	1
C00207	Acetone	CC(C)=O	0
C00222	3-Oxopropanoate	OC(=O)CC=O	0
C00246	Butanoic acid	CCCC(O)=O	0
C00256	(R)-Lactate	C[C@@H](O)C(O)=O	0
C00258	D-Glycerate	OC[C@@H](O)C(O)=O	0
C00266	Glycolaldehyde	OCC=O	0
C00282	MISSING	[H][H]	0
C00383	Malonate	OC(=O)CC(O)=O	0
C00402	D-Aspartate	[NH3+][C@H](CC(O)=O)C(O)=O	1
C00424	(S)-Lactaldehyde	C[C@H](O)C=O	0
C00469	Ethanol	CCO	0
C00479	Propanal	CCC=O	0
C00497	(R)-Malate	O[C@H](CC(O)=O)C(O)=O	0
C00552	meso-Tartaric acid	O[C@@H]([C@@H](O)C(O)=O)C(O)=O	0
C00577	D-Glyceraldehyde	OC[C@@H](O)C=O	0
C00740	D-Serine	[NH3+][C@H](CO)C(O)=O	1
C00797	Ethylamine	CC[NH3+]	1
C00810	(R)-Acetoin	C[C@@H](O)C(C)=O	0
C00937	(R)-Lactaldehyde	C[C@@H](O)C=O	0
C00969	3-Hydroxypropanal	OCCC=O	0
C01013	3-Hydroxypropanoate	OCCC(O)=O	0
C01089	(R)-3-Hydroxybutanoate	C[C@@H](O)CC(O)=O	0
C01146	2-Hydroxy-3-oxopropanoate	OC(C=O)C(O)=O	0
C01380	Ethylene glycol	OCCO	0
C01438	MISSING	C	0
C01769	(S)-Acetoin	C[C@H](O)C(C)=O	0
C01845	Propan-2-ol	CC(C)O	0
C02001	Allyl alcohol	OCC=C	0
C02287	Hydroxymalonate	OC(C(O)=O)C(O)=O	0
C02426	L-Glyceraldehyde	OC[C@H](O)C=O	0
C02457	Propane-1,3-diol	OCCCO	0
C02632	2-Methylpropanoate	CC(C)C(O)=O	0
C02845	Methyl ethyl ketone	CCC(C)=O	0
C02912	(R)-Propane-1,2-diol	C[C@@H](O)CO	0
C02917	(S)-Propane-1,2-diol	C[C@H](O)CO	0
C03134	N,N-Dimethylformamide	CN(C)C=O	0
C03194	(R)-1-Aminopropan-2-ol	C[C@@H](O)C[NH3+]	1
C03197	(S)-3-Hydroxybutanoate	C[C@H](O)CC(O)=O	0
C03505	Hydroxyacetone phosphate	CC(=O)COP(O)(O)=O	0
C03547	omega-Hydroxy fatty acid	OCC(O)=O	0
C03557	2-Aminoethylphosphonate	[NH3+]CCP(O)(O)=O	1
C03961	erythro-3-Hydroxy-Ls-aspartate	[NH3+][C@@H]([C@@H](O)C(O)=O)C(O)=O	1
C05235	Hydroxyacetone	CC(=O)CO	0
C05678	1-Hydroxy-2-aminoethylphosphonate	[NH3+]CC(O)P(O)(O)=O	1
C05979	Propane-1-ol	CCCO	0
C06001	(S)-3-Hydroxyisobutyrate	C[C@@H](CO)C(O)=O	0
C06057	3-Aminopropane-1,2-diol	[NH3+]C[C@H](O)CO	1
C06384	N-(Hydroxymethyl)urea	NC(=O)NCO	0
C06753	2-Chloroethanol	OCCCl	0
C11488	HMMF	CN(CO)C=O	0
C11505	Propylene	CC=C	0
C16363	N-Methylurea	CNC(N)=O	0
C18248	Chloroethane	CCCl	0
C19813	threo-3-Hydroxy-D-aspartate	[NH3+][C@H]([C@@H](O)C(O)=O)C(O)=O	1
C00025	L-Glutamate	[NH3+][C@@H](CCC(O)=O)C(O)=O	1
C00026	2-Oxoglutarate	OC(=O)CCC(=O)C(O)=O	0
C00036	Oxaloacetate	OC(=O)CC(=O)C(O)=O	0
C00049	L-Aspartate	[NH3+][C@@H](CC(O)=O)C(O)=O	1
C00121	D-Ribose	OC[C@H]1OC(O)[C@H](O)[C@@H]1O	0
C00141	3-Methyl-2-oxobutanoic acid	CC(C)C(=O)C(O)=O	0
C00148	L-Proline	OC(=O)[C@@H]1CCC[NH2+]1	1
C00178	Thymine	CC1=CNC(=O)NC1=O	0
C00188	L-Threonine	C[C@@H](O)[C@H]([NH3+])C(O)=O	1
C00231	D-Xylulose 5-phosphate	OCC(=O)[C@@H](O)[C@H](O)COP(O)(O)=O	0
C00246	Butanoic acid	CCCC(O)=O	0
C00263	L-Homoserine	[NH3+][C@@H](CCO)C(O)=O	1
C00282	MISSING	[H][H]	0
C00334	4-Aminobutanoate	[NH3+]CCCC(O)=O	1
C00402	D-Aspartate	[NH3+][C@H](CC(O)=O)C(O)=O	1
C00489	Glutarate	OC(=O)CCCC(O)=O	0
C00620	alpha-D-Ribose 1-phosphate	OC[C@H]1O[C@H](OP(O)(O)=O)[C@H](O)[C@@H]1O	0
C00672	2-Deoxy-D-ribose 1-phosphate	OC[C@H]1O[C@@H](C[C@@H]1O)OP(O)(O)=O	0
C00673	2-Deoxy-D-ribose 5-phosphate	OC1C[C@H](O)[C@@H](COP(O)(O)=O)O1	0
C00763	D-Proline	OC(=O)[C@H]1CCC[NH2+]1	1
C00803	Pentanoate	CCCCC(O)=O	0
C00820	D-Threonine	C[C@H](O)[C@@H]([NH3+])C(O)=O	1
C00975	Dihydroxyfumarate	OC(=O)C(\O)=C(/O)C(O)=O	0
C00989	4-Hydroxybutanoic acid	OCCCC(O)=O	0
C01015	cis-4-Hydroxy-L-proline	O[C@@H]1C[NH2+][C@@H](C1)C(O)=O	1
C01059	2,5-Dihydroxypyridine	[O-]c1ccc([O-])[nH+]c1	-1
C01087	(R)-2-Hydroxyglutarate	O[C@H](CCC(O)=O)C(O)=O	0
C01110	5-Amino-2-oxopentanoic acid	[NH3+]CCCC(=O)C(O)=O	1
C01165	L-Glutamate 5-semialdehyde	[NH3+][C@@H](CCC=O)C(O)=O	1
C01188	3-Hydroxy-2-methylpropanoate	CC(CO)C(O)=O	0
C01801	Deoxyribose	OC[C@H]1OC(O)C[C@@H]1O	0
C01991	4-Hydroxyacid	OCCCC(O)=O	0
C02115	2-Methylserine	C[C@@]([NH3+])(CO)C(O)=O	1
C02132	Acetylpyruvate	CC(=O)CC(=O)C(O)=O	0
C02261	D-2-Aminobutyrate	CC[C@@H]([NH3+])C(O)=O	1
C02356	(S)-2-Aminobutanoate	CC[C@H]([NH3+])C(O)=O	1
C02420	Isobutyronitrile	CC(C)C#N	0
C02479	beta-L-Arabinose	O[C@H]1CO[C@H](O)[C@H](O)[C@H]1O	0
C02502	2-Hydroxypyridine	[O-]c1cccc[nH+]1	0
C02632	2-Methylpropanoate	CC(C)C(O)=O	0
C02659	Acetone cyanohydrin	CC(C)(O)C#N	0
C02783	2-Deoxy-L-arabinose	O[C@@H]1C[C@@H](O)[C@@H](O)CO1	0
C02804	5-Hydroxypentanoate	OCCCCC(O)=O	0
C02928	2-Dehydro-D-xylonate	OC[C@@H](O)[C@H](O)C(=O)C(O)=O	0
C03056	2,6-Dihydroxypyridine	Oc1cccc(O)n1	0
C03059	2-Hydroxymethylserine	[NH3+]C(CO)(CO)C(O)=O	1
C03066	3-Hydroxy-L-glutamate	[NH3+][C@@H](C(O)CC(O)=O)C(O)=O	1
C03079	4-Hydroxy-L-glutamate	[NH3+][C@@H](CC(O)C(O)=O)C(O)=O	1
C03088	5-Hydroxymethyluracil	OCC1=CNC(=O)NC1=O	0
C03196	(S)-2-Hydroxyglutarate	O[C@@H](CCC(O)=O)C(O)=O	0
C03440	cis-4-Hydroxy-D-proline	O[C@H]1C[NH2+][C@H](C1)C(O)=O	1
C03458	2,3,6-Trihydroxypyridine	Oc1ccc(O)c(O)n1	0
C03459	2-Hydroxy-3-oxosuccinate	OC(C(O)=O)C(=O)C(O)=O	0
C03589	4-Hydroxy-2-oxopentanoate	CC(O)CC(=O)C(O)=O	0
C03651	trans-4-Hydroxy-D-proline	O[C@@H]1C[NH2+][C@H](C1)C(O)=O	1
C03665	2-Amino-2-methylpropanoate	CC(C)([NH3+])C(O)=O	1
C03678	4-Amino-3-hydroxybutanoate	[NH3+]CC(O)CC(O)=O	1
C03736	alpha-D-Ribose 5-phosphate	O[C@H]1O[C@H](COP(O)(O)=O)[C@@H](O)[C@H]1O	0
C03826	2-Dehydro-3-deoxy-D-xylonate	OC[C@@H](O)CC(=O)C(O)=O	0
C03981	2-Hydroxyethylenedicarboxylate	OC(=O)\C=C(/O)C(O)=O	0
C04181	3-Hydroxy-3-methyl-2-oxobutanoic acid	CC(C)(O)C(=O)C(O)=O	0
C05406	5-Hydroxy-2,4-dioxopentanoate	OCC(=O)CC(=O)C(O)=O	0
C05519	L-Allothreonine	C[C@H](O)[C@H]([NH3+])C(O)=O	1
C05938	L-4-Hydroxyglutamate semialdehyde	[NH3+][C@@H](C[C@@H](O)C=O)C(O)=O	1
C05941	2-Oxo-4-hydroxy-5-aminovalerate	[NH3+]C[C@H](O)CC(=O)C(O)=O	1
C05942	Pyrrole-2-carboxylate	OC(=O)c1ccc[nH]1	0
C05946	(4R)-4-Hydroxy-2-oxoglutarate	O[C@H](CC(=O)C(O)=O)C(O)=O	0
C05984	2-Hydroxybutanoic acid	CC[C@H](O)C(O)=O	0
C06056	4-Hydroxy-L-threonine	[NH3+][C@@H]([C@H](O)CO)C(O)=O	1
C06255	2-Oxopentanoic acid	CCCC(=O)C(O)=O	0
C07182	Tromethamine	[NH3+]C(CO)(CO)CO	1
C07490	Trichloroethanol	OCC(Cl)(Cl)Cl	0
C11260	2-Amino-2-methyl-1,3-propandiol	CC([NH3+])(CO)CO	1
C11437	1-Deoxy-D-xylulose 5-phosphate	CC(=O)[C@@H](O)[C@H](O)COP(O)(O)=O	0
C11511	threo-3-Hydroxy-L-aspartate	[NH3+][C@@H]([C@H](O)C(O)=O)C(O)=O	1
C12317	D-Allothreonine	C[C@@H](O)[C@@H]([NH3+])C(O)=O	1
C13240	Ether	CCOCC	0
C14687	2-Ethoxyethanol	CCOCCO	0
C14689	Diethylene glycol	OCCOCCO	0
C16637	5-Deoxyribose-1-phosphate	C[C@H]1O[C@H](OP(O)(O)=O)[C@H](O)[C@@H]1O	0
C16639	beta-D-Ribofuranose	OC[C@H]1O[C@@H](O)[C@H](O)[C@@H]1O	0
C18246	1,1,1-Trichloroethane	CC(Cl)(Cl)Cl	0
C19721	5-Hydroxypyrrole-2-carboxylate	OC(=O)c1ccc(O)[nH]1	0
C19838	D-erythro-3-Hydroxyaspartate	[NH3+][C@H]([C@H](O)C(O)=O)C(O)=O	1
C00001	H20	O	0
C00026	2-Oxoglutarate	OC(=O)CCC(=O)C(O)=O	0
C00031	D-Glucose	OC[C@H]1OC(O)[C@H](O)[C@@H](O)[C@@H]1O	0
C00047	L-Lysine	[NH3+]CCCC[C@H]([NH3+])C(O)=O	2
C00062	L-Arginine	NC(=[NH2+])NCCC[C@H]([NH3+])C(O)=O	2
C00090	Catechol	Oc1ccccc1O	0
C00146	Phenol	Oc1ccccc1	0
C00148	L-Proline	OC(=O)[C@@H]1CCC[NH2+]1	1
C00158	Citrate	OC(=O)CC(O)(CC(O)=O)C(O)=O	0
C00204	2-Dehydro-3-deoxy-D-gluconate	OC[C@@H](O)[C@@H](O)CC(=O)C(O)=O	0
C00221	beta-D-Glucose	OC[C@H]1O[C@@H](O)[C@H](O)[C@@H](O)[C@@H]1O	0
C00253	Nicotinate	OC(=O)c1ccc[nH+]c1	1
C00267	alpha-D-Glucose	OC[C@H]1O[C@H](O)[C@H](O)[C@@H](O)[C@@H]1O	0
C00282	MISSING	[H][H]	0
C00311	Isocitrate	OC(C(CC(O)=O)C(O)=O)C(O)=O	0
C00414	Cyclohexanone	O=C1CCCCC1	0
C00530	Hydroquinone	Oc1ccc(O)cc1	0
C00586	2-Deoxy-D-glucose	OC[C@H]1OC(O)C[C@@H](O)[C@@H]1O	0
C00668	alpha-D-Glucose 6-phosphate	O[C@H]1O[C@H](COP(O)(O)=O)[C@@H](O)[C@H](O)[C@H]1O	0
C00747	Pyridine	c1cc[nH+]cc1	1
C00962	beta-D-Galactose	OC[C@H]1O[C@@H](O)[C@H](O)[C@@H](O)[C@H]1O	0
C00984	alpha-D-Galactose	OC[C@H]1O[C@H](O)[C@H](O)[C@@H](O)[C@H]1O	0
C01018	6-Deoxy-D-galactose	C[C@H]1OC(O)[C@H](O)[C@@H](O)[C@H]1O	0
C01019	6-Deoxy-L-galactose	C[C@@H]1OC(O)[C@@H](O)[C@H](O)[C@@H]1O	0
C01020	6-Hydroxynicotinate	OC(=O)c1ccc(O)nc1	0
C01059	2,5-Dihydroxypyridine	[O-]c1ccc([O-])[nH+]c1	-1
C01062	5-Dehydro-D-gluconate	OCC(=O)[C@@H](O)[C@H](O)[C@@H](O)C(O)=O	0
C01108	1,2,3-Trihydroxybenzene	Oc1cccc(O)c1O	0
C01113	D-Galactose 6-phosphate	OC1O[C@H](COP(O)(O)=O)[C@H](O)[C@H](O)[C@H]1O	0
C01127	4-Hydroxy-2-oxoglutarate	OC(CC(=O)C(O)=O)C(O)=O	0
C01147	2-Hydroxycyclohexan-1-one	OC1CCCCC1=O	0
C01151	D-Ribose 1,5-bisphosphate	O[C@H]1[C@@H](O)[C@@H](OP(O)([O-])=O)O[C@@H]1COP(O)(O)=O	-1
C01172	beta-D-Glucose 6-phosphate	O[C@@H]1O[C@H](COP(O)(O)=O)[C@@H](O)[C@H](O)[C@H]1O	0
C01216	2-Dehydro-3-deoxy-D-galactonate	OC[C@@H](O)[C@H](O)CC(=O)C(O)=O	0
C01218	6-Phospho-2-dehydro-D-gluconate	O[C@H](COP(O)(O)=O)[C@@H](O)[C@H](O)C(=O)C(O)=O	0
C01407	Benzene	c1ccccc1	0
C01720	L-Fuconate	C[C@H](O)[C@@H](O)[C@@H](O)[C@H](O)C(O)=O	0
C01751	Resorcinol	Oc1cccc(O)c1	0
C01825	L-Galactose	OC[C@@H]1OC(O)[C@@H](O)[C@H](O)[C@@H]1O	0
C01854	Streptamine	[NH3+][C@H]1[C@H](O)[C@@H]([NH3+])[C@H](O)[C@@H](O)[C@@H]1O	2
C01988	2-Nitrophenol	Oc1ccccc1[N+]([O-])=O	0
C02095	beta-D-Fucose	C[C@H]1O[C@@H](O)[C@H](O)[C@@H](O)[C@H]1O	0
C02126	4-Nitroaniline	[NH3+]c1ccc(cc1)[N+]([O-])=O	1
C02129	5-Oxohexanoic acid	CC(=O)CCCC(O)=O	0
C02183	Phloroglucinol	Oc1cc(O)cc(O)c1	0
C02235	4-Nitrocatechol	Oc1ccc(cc1O)[N+]([O-])=O	0
C02502	2-Hydroxypyridine	[O-]c1cccc[nH+]1	0
C02522	6-Deoxy-D-glucose	C[C@H]1OC(O)[C@H](O)[C@@H](O)[C@@H]1O	0
C02627	2-Deoxystreptamine	[NH3+][C@H]1C[C@@H]([NH3+])[C@H](O)[C@@H](O)[C@@H]1O	2
C02781	2-Deoxy-D-galactose	OC[C@H]1OC(O)C[C@@H](O)[C@H]1O	0
C02884	Ribose triphosphate	O[C@@H]1O[C@H](COP(O)(=O)OP([O-])(=O)OP(O)(O)=O)[C@@H](O)[C@H]1O	-1
C03348	3,6-Dideoxy-L-galactose	C[C@@H]1O[C@@H](O)[C@@H](O)C[C@@H]1O	0
C03458	2,3,6-Trihydroxypyridine	Oc1ccc(O)c(O)n1	0
C03912	(S)-1-Pyrroline-5-carboxylate	OC(=O)[C@@H]1CCC=[NH+]1	1
C04175	2-Deoxy-D-ribose 1,5-bisphosphate	O[C@H]1C[C@@H](OP(O)(O)=O)O[C@@H]1COP(O)([O-])=O	-1
C04281	L-1-Pyrroline-3-hydroxy-5-carboxylate	O[C@@H]1C[C@H]([NH+]=C1)C(O)=O	1
C04442	2-Dehydro-3-deoxy-6-phospho-D-gluconate	O[C@H](COP(O)(O)=O)[C@@H](O)CC(=O)C(O)=O	0
C05147	trans-3-Hydroxy-L-proline	O[C@H]1CC[NH2+][C@@H]1C(O)=O	1
C06159	2-Dehydro-3-deoxy-D-fuconate	C[C@@H](O)[C@H](O)CC(=O)C(O)=O	0
C06231	Ectoine	CC1=[NH+][C@@H](CCN1)C(O)=O	1
C06369	2-Deoxy-D-glucose 6-phosphate	OC1C[C@@H](O)[C@H](O)[C@@H](COP(O)(O)=O)O1	0
C06471	Abequose	C[C@H]1OC(O)[C@H](O)C[C@H]1O	0
C06813	Nitrobenzene	[O-][N+](=O)c1ccccc1	0
C06892	2-Deoxy-5-keto-D-gluconic acid	OCC(=O)[C@@H](O)[C@H](O)CC(O)=O	0
C10164	Picolinic acid	[O-]C(=O)c1cccc[nH+]1	0
C11272	Fluorobenzene	Fc1ccccc1	0
C12347	Deoxyribose triphosphate	O[C@H]1C[C@H](O)[C@@H](COP(O)(=O)OP([O-])(=O)OP(O)(O)=O)O1	-1
C14418	3-Nitrophenol	Oc1cccc(c1)[N+]([O-])=O	0
C15930	L-Galactonate	OC[C@H](O)[C@@H](O)[C@@H](O)[C@H](O)C(O)=O	0
C16245	D-Glucuronic acid	O[C@@H](C=O)[C@@H](O)[C@H](O)[C@H](O)C(O)=O	0
C16272	3-Hydroxy-5-oxohexanoate	CC(=O)CC(O)CC(O)=O	0
C16432	5-Hydroxyectoine	CC1=[NH+][C@@H]([C@@H](O)CN1)C(O)=O	1
C16473	4-Fluorocatechol	Oc1ccc(F)cc1O	0
C16485	4-Fluorophenol	Oc1ccc(F)cc1	0
C16737	5-Deoxy-D-glucuronate	O[C@H](CC(O)=O)[C@H](O)[C@@H](O)C=O	0
C16742	allo-Hydroxy-L-lysine	[NH3+]C[C@@H](O)CC[C@H]([NH3+])C(O)=O	2
C18473	beta-Hydroxyarginine	NC(=[NH2+])NCC[C@H](O)[C@H]([NH3+])C(O)=O	2
C18620	3-Hydroxypicolinic acid	Oc1ccc[nH+]c1C([O-])=O	0
C19321	2-Amino-4-nitrophenol	[NH3+]c1cc(ccc1O)[N+]([O-])=O	1
C19322	2-Amino-5-nitrophenol	[NH3+]c1ccc(cc1O)[N+]([O-])=O	1
C19706	cis-3-Hydroxy-L-proline	O[C@@H]1CC[NH2+][C@@H]1C(O)=O	1
C19806	Propane-1,2,3-tricarboxylate	OC(=O)CC(CC(O)=O)C(O)=O	0
C00001	H20	O	0
C00047	L-Lysine	[NH3+]CCCC[C@H]([NH3+])C(O)=O	2
C00062	L-Arginine	NC(=[NH2+])NCCC[C@H]([NH3+])C(O)=O	2
C00090	Catechol	Oc1ccccc1O	0
C00204	2-Dehydro-3-deoxy-D-gluconate	OC[C@@H](O)[C@@H](O)CC(=O)C(O)=O	0
C00261	Benzaldehyde	O=Cc1ccccc1	0
C00267	alpha-D-Glucose	OC[C@H]1O[C@H](O)[C@H](O)[C@@H](O)[C@@H]1O	0
C00282	MISSING	[H][H]	0
C00292	Aniline	[NH3+]c1ccccc1	1
C00414	Cyclohexanone	O=C1CCCCC1	0
C00472	p-Benzoquinone	O=C1C=CC(=O)C=C1	0
C00530	Hydroquinone	Oc1ccc(O)cc1	0
C00586	2-Deoxy-D-glucose	OC[C@H]1OC(O)C[C@@H](O)[C@@H]1O	0
C00633	4-Hydroxybenzaldehyde	Oc1ccc(C=O)cc1	0
C00846	3-Oxoadipate	OC(=O)CCC(=O)CC(O)=O	0
C00854	Cyclohexanol	OC1CCCCC1	0
C00870	4-Nitrophenol	Oc1ccc(cc1)[N+]([O-])=O	0
C00880	D-Galactonate	OC[C@@H](O)[C@H](O)[C@H](O)[C@@H](O)C(O)=O	0
C00902	2-Oxohexanoic acid	CCCCC(=O)C(O)=O	0
C00993	D-Alanyl-D-alanine	C[C@@H]([NH3+])C(=O)N[C@H](C)C(O)=O	1
C01020	6-Hydroxynicotinate	OC(=O)c1ccc(O)nc1	0
C01108	1,2,3-Trihydroxybenzene	Oc1cccc(O)c1O	0
C01214	1-Amino-1-deoxy-scyllo-inositol	[NH3+][C@H]1[C@H](O)[C@@H](O)[C@H](O)[C@@H](O)[C@@H]1O	1
C01216	2-Dehydro-3-deoxy-D-galactonate	OC[C@@H](O)[C@H](O)CC(=O)C(O)=O	0
C01403	Anisole	COc1ccccc1	0
C01407	Benzene	c1ccccc1	0
C01585	Hexanoic acid	CCCCCC(O)=O	0
C01680	D-Fuconate	C[C@@H](O)[C@H](O)[C@H](O)[C@@H](O)C(O)=O	0
C01880	epsilon-Caprolactone	O=C1CCCCCO1	0
C01987	2-Aminophenol	[NH3+]c1ccccc1O	1
C02183	Phloroglucinol	Oc1cc(O)cc(O)c1	0
C02235	4-Nitrocatechol	Oc1ccc(cc1O)[N+]([O-])=O	0
C02262	D-Galactosamine	[NH3+][C@H]1C(O)O[C@H](CO)[C@H](O)[C@@H]1O	1
C02360	2-Hydroxyadipate	OC(CCCC(O)=O)C(O)=O	0
C02372	4-Hydroxyaniline	[NH3+]c1ccc(O)cc1	1
C02720	Hydroxylaminobenzene	[OH2+][NH2+]c1ccccc1	2
C02814	Benzene-1,2,4-triol	Oc1ccc(O)c(O)c1	0
C03067	3-Hydroxybenzaldehyde	Oc1cccc(C=O)c1	0
C03177	Streptamine phosphate	[NH3+][C@H]1[C@H](O)[C@@H]([NH3+])[C@H](O)[C@@H](OP(O)([O-])=O)[C@@H]1O	1
C03217	2-Hydroxy-3-oxoadipate	OC(C(O)=O)C(=O)CCC(O)=O	0
C03228	3-Hydroxycyclohexanone	OC1CCCC(=O)C1	0
C03241	6-Hydroxyhexan-6-olide	OC1CCCCC(=O)O1	0
C03342	2-Dehydro-D-galactonate	OC[C@@H](O)[C@H](O)[C@H](O)C(=O)C(O)=O	0
C03383	D-Galactono-1,4-lactone	OC[C@@H](O)[C@@H]1OC(=O)[C@H](O)[C@H]1O	0
C03433	Streptamine 4-phosphate	[NH3+][C@@H]1[C@@H](O)[C@H]([NH3+])[C@@H](OP(O)([O-])=O)[C@H](O)[C@H]1O	1
C03739	trans-1,2-Cyclohexanediol	O[C@@H]1CCCC[C@H]1O	0
C03743	1,2,3,5-Tetrahydroxybenzene	Oc1cc(O)c(O)c(O)c1	0
C03828	2-Deoxystreptamine phospahte	[NH3+][C@H]1C[C@@H]([NH3+])[C@H](O)[C@@H](OP(O)(O)=O)[C@@H]1O	2
C03980	2-Deoxystreptamine 4-phosphate	[NH3+][C@@H]1C[C@H]([NH3+])[C@@H](OP(O)([O-])=O)[C@H](O)[C@H]1O	1
C05058	m-Aminophenol	[NH3+]c1cccc(O)c1	1
C06103	6-Hydroxyhexanoic acid	OCCCCCC(O)=O	0
C06104	Adipate	OC(=O)CCCCC(O)=O	0
C06158	D-Fucono-1,4-lactone	C[C@@H](O)[C@@H]1OC(=O)[C@H](O)[C@H]1O	0
C06473	2-Keto-D-gluconic acid	OC[C@@H](O)[C@@H](O)[C@H](O)C(=O)C(O)=O	0
C06674	4-Sulfocatechol	Oc1ccc(cc1O)S([O-])(=O)=O	-1
C06762	4-Hydroxy-2-oxohexanoic acid	CCC(O)CC(=O)C(O)=O	0
C06763	Nojirimycin	OC[C@H]1[NH2+]C(O)[C@H](O)[C@@H](O)[C@@H]1O	1
C06813	Nitrobenzene	[O-][N+](=O)c1ccccc1	0
C07103	2-Hydroxy-1,4-benzoquinone	OC1=CC(=O)C=CC1=O	0
C08284	gamma-Hydroxy-L-arginine	NC(=[NH2+])NCC(O)C[C@H]([NH3+])C(O)=O	2
C11036	Bromobenzene	Brc1ccccc1	0
C11101	5-Hydroxymethyl-2-furaldehyde	OCc1ccc(C=O)o1	0
C11115	5-Methyl-2-furaldehyde	Cc1ccc(C=O)o1	0
C11249	Cyclohexane	C1CCCCC1	0
C12313	cis-1,2-Cyclohexanediol	O[C@H]1CCCC[C@H]1O	0
C12314	1-Oxa-2-oxo-3-hydroxycycloheptane	OC1CCCCOC1=O	0
C12849	p-Phenolsulfonic acid	Oc1ccc(cc1)S([O-])(=O)=O	-1
C14418	3-Nitrophenol	Oc1cccc(c1)[N+]([O-])=O	0
C14453	4-Bromophenol	Oc1ccc(Br)cc1	0
C14602	3-Hydroxyaminophenol	Oc1cccc([NH2+][OH2+])c1	2
C14604	Aminohydroquinone	[NH3+]c1cc(O)ccc1O	1
C14841	2-Bromophenol	Oc1ccccc1Br	0
C14843	4-Bromocatechol	Oc1ccc(Br)cc1O	0
C15478	D-Fucosamine	C[C@H]1OC(O)[C@H]([NH3+])[C@@H](O)[C@H]1O	1
C15523	2,6-Dihydroxynicotinate	OC(=O)c1ccc(O)nc1O	0
C15571	Catechol	Oc1ccccc1O	0
C15572	Guaiacol	COc1ccccc1O	0
C15584	Phenol	Oc1ccccc1	0
C16700	3,4-Dihydroxybenzaldehyde	Oc1ccc(C=O)cc1O	0
C16741	L-Hydroxylysine	[NH3+]C[C@H](O)CC[C@H]([NH3+])C(O)=O	2
C16843	Deoxynojirimycin	OC[C@H]1[NH2+]C[C@H](O)[C@@H](O)[C@@H]1O	1
C17580	2-Deoxy-scyllo-inosamine	[NH3+][C@H]1C[C@@H](O)[C@H](O)[C@@H](O)[C@@H]1O	1
C18351	4-Aminocatechol	[NH3+]c1ccc(O)c(O)c1	1
C19719	D-Alanyl-D-serine	C[C@@H]([NH3+])C(=O)N[C@H](CO)C(O)=O	1
C00001	H20	O	0
C00108	Anthranilate	[NH3+]c1ccccc1C(O)=O	1
C00156	4-Hydroxybenzoate	OC(=O)c1ccc(O)cc1	0
C00180	Benzoate	OC(=O)c1ccccc1	0
C00196	2,3-Dihydroxybenzoate	OC(=O)c1cccc(O)c1O	0
C00230	3,4-Dihydroxybenzoate	OC(=O)c1ccc(O)c(O)c1	0
C00261	Benzaldehyde	O=Cc1ccccc1	0
C00282	MISSING	[H][H]	0
C00318	L-Carnitine	C[N+](C)(C)C[C@H](O)CC(O)=O	1
C00556	Benzyl alcohol	OCc1ccccc1	0
C00568	4-Aminobenzoate	[NH3+]c1ccc(cc1)C(O)=O	1
C00587	3-Hydroxybenzoate	OC(=O)c1cccc(O)c1	0
C00628	2,5-Dihydroxybenzoate	OC(=O)c1cc(O)ccc1O	0
C00632	3-Hydroxyanthranilate	[NH3+]c1c(O)cccc1C(O)=O	1
C00633	4-Hydroxybenzaldehyde	Oc1ccc(C=O)cc1	0
C00727	Orcinol	Cc1cc(O)cc(O)c1	0
C00805	Salicylate	OC(=O)c1ccccc1O	0
C01181	4-Trimethylammoniobutanoate	C[N+](C)(C)CCCC(O)=O	1
C01403	Anisole	COc1ccccc1	0
C01424	Gallate	OC(=O)c1cc(O)c(O)c(O)c1	0
C01455	Toluene	Cc1ccccc1	0
C01467	3-Cresol	Cc1cccc(O)c1	0
C01468	4-Cresol	Cc1ccc(O)cc1	0
C01502	o-Methoxyphenol	COc1ccccc1O	0
C01542	o-Cresol	Cc1ccccc1O	0
C01924	Homoarginine	NC(=[NH2+])NCCCC[C@H]([NH3+])C(O)=O	2
C02123	3-Propylmalate	CCCC([C@H](O)C(O)=O)C(O)=O	0
C02124	4-Chlorophenol	Oc1ccc(Cl)cc1	0
C02323	Salicyl alcohol	OCc1ccccc1O	0
C02375	4-Chlorocatechol	Oc1ccc(Cl)cc1O	0
C02518	4-Aminosalicylate	[NH3+]c1ccc(C(O)=O)c(O)c1	1
C02923	2,3-Dihydroxytoluene	Cc1cccc(O)c1O	0
C03067	3-Hydroxybenzaldehyde	Oc1cccc(C=O)c1	0
C03338	2,3,5-Trihydroxytoluene	Cc1cc(O)cc(O)c1O	0
C03351	3-Hydroxybenzyl alcohol	OCc1cccc(O)c1	0
C04359	1-Deoxy-D-altro-heptulose 7-phosphate	CC(=O)[C@@H](O)[C@H](O)[C@H](O)[C@H](O)COP(O)(O)=O	0
C04404	trans-4-Hydroxycyclohexanecarboxylate	O[C@H]1CC[C@@H](CC1)C(O)=O	0
C05382	Sedoheptulose 7-phosphate	OCC(=O)[C@@H](O)[C@H](O)[C@H](O)[C@H](O)COP(O)(O)=O	0
C05585	Gentisate aldehyde	Oc1ccc(O)c(C=O)c1	0
C05601	4-Hydroxy-2-oxo-heptanedioate	OC(CCC(O)=O)CC(=O)C(O)=O	0
C05618	3-Chlorocatechol	Oc1cccc(Cl)c1O	0
C06202	Salicylaldehyde	Oc1ccccc1C=O	0
C06328	6-Chlorobenzene-1,2,4-triol	Oc1cc(O)c(O)c(Cl)c1	0
C06601	Chlorohydroquinone	Oc1ccc(O)c(Cl)c1	0
C06677	Toluene-4-sulfonate	Cc1ccc(cc1)S([O-])(=O)=O	-1
C06678	4-Sulfobenzyl alcohol	OCc1ccc(cc1)S([O-])(=O)=O	-1
C06730	4-Methylcatechol	Cc1ccc(O)c(O)c1	0
C06990	Chlorobenzene	Clc1ccccc1	0
C07102	5-Chloro-1,2,4-trihydroxybenzene	Oc1cc(O)c(Cl)cc1O	0
C07555	4-Nitroanisole	COc1ccc(cc1)[N+]([O-])=O	0
C08286	(+)-gamma-Hydroxy-L-homoarginine	NC(=[NH2+])NCC[C@@H](O)C[C@H]([NH3+])C(O)=O	2
C09822	Cyclohexane-1-carboxylate	OC(=O)C1CCCCC1	0
C10792	Gentisyl alcohol	OCc1cc(O)ccc1O	0
C11465	3,5-Dihydroxyanthranilate	[NH3+]c1c(O)cc(O)cc1C(O)=O	1
C13747	1,7-Dimethylxanthine	CN1C(=O)Nc2ncn(C)c2C1=O	0
C14110	4-Hydroxymethylcatechol	OCc1ccc(O)c(O)c1	0
C14219	2-Chlorophenol	Oc1ccccc1Cl	0
C14270	3-Chlorophenol	Oc1cccc(Cl)c1	0
C15025	(S)-Carnitine	C[N+](C)(C)C[C@@H](O)CC(O)=O	1
C16356	1,7-Dimethyluric acid	CN1C(=O)NC2=C1C(=O)N(C)C(=O)N2	0
C16588	2-Oxopimelate	OC(=O)CCCCC(=O)C(O)=O	0
C16657	2-Propylsuccinic acid	CCCC(CC(O)=O)C(O)=O	0
C16700	3,4-Dihydroxybenzaldehyde	Oc1ccc(C=O)cc1O	0
C16994	Anthopleurine	C[N+](C)(C)C[C@H](O)[C@@H](O)C(O)=O	1
C17385	2-Methoxy-5-nitrophenol	COc1ccc(cc1O)[N+]([O-])=O	0
C17467	p-Hydroxybenzyl alcohol	OCc1ccc(O)cc1	0
C18317	2,4,5-Trihydroxytoluene	Cc1cc(O)c(O)cc1O	0
C18653	DNOC	Cc1cc(cc(c1O)[N+]([O-])=O)[N+]([O-])=O	0
C19410	3,5-Dinitrotoluene	Cc1cc(cc(c1)[N+]([O-])=O)[N+]([O-])=O	0
