# Supplementary material for: Quantum chemistry reveals thermodynamic principles of redox biochemistry
Source: PLoS Comput Biol. 2018 Oct 24;14(10):e1006471. doi: 10.1371/journal.pcbi.1006471 (PMC6218094; doi:10.1371/journal.pcbi.1006471)
Supplement: S5 Dataset — (XLSX) [file pcbi.1006471.s017.xlsx]

## Sheet: Dataset_S5
SPE Accronym	SPE Model Chemistry (Functional/WaveFunction_BasisSet_Solvation_DispersionCorrection)	GO Accronym	GO Model Chemistry (Functional/WaveFunction_BasisSet_Solvation_DispersionCorrection)	Pearson r	R2 (Coefficient of Determination)
DL4DC_B32DC	DLPNO-CCSD(T)_DefBas-4_COSMO_D3	B32DC	B3LYP_DefBas-2_COSMO_D3	0.710832	0.505282
B25DC_B32DC	B2PLYP_DefBas-5_COSMO_D3	B32DC	B3LYP_DefBas-2_COSMO_D3	0.698697	0.488177
RI4DC_B3d2NC	RI-SCS-MP2_DefBas-4_COSMO_D3	B32NC	B3LYP_DefBas-2_COSMO_no-D3	0.566922	0.321401
DL4DC_B3d2NC	DLPNO-CCSD(T)_DefBas-4_COSMO_D3	B32NC	B3LYP_DefBas-2_COSMO_no-D3	0.563689	0.317745
B24DC_B3d2NC	B2PLYP_DefBas-4_COSMO_D3	B32NC	B3LYP_DefBas-2_COSMO_no-D3	0.561644	0.315444
WB4DC_B3d2NC	WB97X_DefBas-4_COSMO_D3	B32NC	B3LYP_DefBas-2_COSMO_no-D3	0.546801	0.298991
B25DC_B3d2NC	B2PLYP_DefBas-5_COSMO_D3	B32NC	B3LYP_DefBas-2_COSMO_no-D3	0.545052	0.297081
DS4DC_B3d2NC	DSD-PBEP86_DefBas-4_COSMO_D3	B32NC	B3LYP_DefBas-2_COSMO_no-D3	0.544403	0.296375
CA4DC_B3d2NC	CAM-B3LYP_DefBas-4_COSMO_D3	B32NC	B3LYP_DefBas-2_COSMO_no-D3	0.541906	0.293662
B26DC_B3d2NC	B2PLYP_DefBas-6_COSMO_D3	B32NC	B3LYP_DefBas-2_COSMO_no-D3	0.537089	0.288465
B34DC_B3d2NC	B3LYP_DefBas-4_COSMO_D3	B32NC	B3LYP_DefBas-2_COSMO_no-D3	0.524744	0.275356
TP4DC_B3d2NC	TPSS0_DefBas-4_COSMO_D3	B32NC	B3LYP_DefBas-2_COSMO_no-D3	0.523507	0.27406
	SPE = Single Point Energy
	GO = Geometry Optimization
	DefBas-X = Orca 3.0.3 default basis sets (see SI Table 3)
	D3 = dispersion correction
	Note: as mentioned in SI text, all accuracy measures were obtained with the available experimental data for the G3 reaction category (carbonyl to amine reduction)
